# Supplementary material for: Determining relevant traits for selecting landrace accessions of Phaseolus lunatus L. for insect resistance
Source: PeerJ. 2021 Sep 16;9:e12088. doi: 10.7717/peerj.12088 (PMC8450006; doi:10.7717/peerj.12088)
Supplement: Supplemental Information 1 — The raw data are arranged by pages and each corresponds to an analysis of the article. [file peerj-09-12088-s001.xlsx]

## Sheet: Collection data 
Accession	Species	Subespecie	Collector	Country	State	Origin site	Location	Local name	Color seed
RRRS0001	Phaseolus lunatus	lunatus	Roberto Ruiz	Mexico	Yucatan	Tizimin	Tizimin	Mulicion	White
JMC1271	Phaseolus lunatus	lunatus	Jaime Martinez	Mexico	Quintana Roo	Tulum	Chanchen	Putsicasutsuy	Red gray
JMC1280	Phaseolus lunatus	lunatus	Jaime Martinez	Mexico	Quintana Roo	Felipe Carrillo Puerto	Felipe Carrillo Puerto	Mulicion	White
RRRS0002	Phaseolus lunatus	lunatus	Roberto Ruiz	Mexico	Yucatan	Tizimin	Tizimin	Mulicion	White
JMC1255	Phaseolus lunatus	lunatus	Jaime Martinez	Mexico	Campeche	Calkini	Bacanchan	Mulicion	White
JMC1304	Phaseolus lunatus	lunatus	Felix Dzul Tejero	Mexico	Campeche	Calkini	Bacanchan	Mulicion	White
JMC1240	Phaseolus lunatus	lunatus	Jaime Martinez	Mexico	Yucatan	Peto	Timul	Putsicasutsuy	Red gray
JMC1350	Phaseolus lunatus	lunatus	Jaime Martinez	Mexico	Campeche	Hopelchen	Bolonchen	X-Nuk ib	White
JMC1254	Phaseolus lunatus	lunatus	Jaime Martinez	Mexico	Yucatan	Tahdziu	Tahdziu	Putsicasutsuy	Red gray
JMC1327	Phaseolus lunatus	lunatus	Jaime Martinez	Mexico	Campeche	Hecelchakan	X-cumpich	Mulicion	White
JMC1273	Phaseolus lunatus	lunatus	Jaime Martinez	Mexico	Campeche	Hopelchen	Vicente Guerrero (Iturbide)	Putsicasutsuy	Red gray
JMC1357	Phaseolus lunatus	lunatus	Jaime Martinez	Mexico	Campeche	Calkini	Pucnachen	Mejen ib	White
JMC1345	Phaseolus lunatus	lunatus	Jaime Martinez	Mexico	Yucatan	Tixmehuac	Sabacche	Mulicion	White
JMC1270	Phaseolus lunatus	lunatus	Jaime Martinez	Mexico	Yucatan	Tixmehuac	Xcohil	Chak ib	Red
JMC1337	Phaseolus lunatus	lunatus	Jaime Martinez	Mexico	Campeche	Hopelchen	Chunek	Mulicion	White
JMC1245	Phaseolus lunatus	lunatus	Felix Dzul Tejero	Mexico	Campeche	Calkini	Pucnachen	Putsicasutsuy	Red
JMC1208	Phaseolus lunatus	lunatus	Jaime Martinez	Mexico	Yucatan	Chankom	Tzucmuc	Sac ib	White
JMC1348	Phaseolus lunatus	lunatus	Jaime Martinez	Mexico	Yucatan	Peto	Timul	Sak X-nuk ib	White
JMC1339	Phaseolus lunatus	lunatus	Jaime Martinez	Mexico	Yucatan	Yaxcaba	Santa María	Sac ib	White
JMC1288	Phaseolus lunatus	lunatus	Felix Dzul Tejero	Mexico	Yucatan	Tekax	Salvador Alvarado	Box ib	Black
JMC1306	Phaseolus lunatus	lunatus	Jaime Martinez	Mexico	Yucatan	Tzucacab	Escondido	Mulicion	White
JMC1264	Phaseolus lunatus	lunatus	Jaime Martinez	Mexico	Yucatan	Yaxcaba	Santa María	Chak ib	Red
JMC1325	Phaseolus lunatus	lunatus	Jaime Martinez	Mexico	Yucatan	Tekax	Kinil	Mejen ib	White
JMC1297	Phaseolus lunatus	lunatus	Felix Dzul Tejero	Mexico	Yucatan	Tixmehuac	Xcohil	Sac ib	White
JMC1313	Phaseolus lunatus	lunatus	Jaime Martinez	Mexico	Yucatan	Tekax	Jose Lopez Portillo	Sacmejen	White
JMC1336	Phaseolus lunatus	lunatus	Jaime Martinez	Mexico	Yucatan	Tekax	Benito Juarez	Sacmejen	White
JMC1364	Phaseolus lunatus	lunatus	Jaime Martinez	Mexico	Yucatan	Tekom	Xuxcáb	Sac ib	White

## Sheet: Traits
DDE	Date	Accession	Plot	Random	Plant	Leaves	Hardness	Thickness	Leaf area	Dry mass of leaves	SLA	Trichomes		Row label	Mean Trichomes	SD Trichomes	Mean Leavess	SD Leaves	Mean Dry mass of leaves	SD Dry mass of leaves	Mean Leaf area	SD Leaf area	Mean SLA	SD SLA	Mean Hardness	SD Hardness	Mean Thickness	SD Thickness
60	2019-11-06	RRRS0001	Left	1	1	330	0.5	0.424	631.224	1.90491	331.367	19.6667		Izam	20.3556	3.30312	295.867	32.8509	2.15521	0.277689	565.934	62.8372	269.646	55.9629	0.55	0.163299	0.3212	0.0890462
60	2019-11-06	RRRS0001	Left	2	2	315	1	0.247	602.532	1.99562	301.927	16		JMC1208	10.3111	1.07129	723.933	183.198	0.935425	0.288282	1384.74	350.422	1696.82	832.034	0.624533	0.118038	0.286	0.069307
60	2019-11-06	RRRS0001	Left	3	3	302	0.5	0.288	577.666	2.08153	277.52	21.6667		JMC1240	12.2	2.40308	270.2	143.179	2.04214	0.474123	1034.57	134.908	535.002	140.546	0.55	0.163299	0.320933	0.0729186
60	2019-11-06	RRRS0001	Left	4	4	329	0.75	0.373	629.311	1.9107	329.361	22.3333		JMC1245	11.8444	1.61872	244.4	48.4985	2.66832	0.491197	467.488	92.768	188.911	76.7086	0.6	0.196638	0.323333	0.0949854
60	2019-11-06	RRRS0001	Left	5	5	285	0.5	0.248	545.148	2.20569	247.156	20.3333		JMC1254	13.7778	4.27857	585.333	28.4081	1.07677	0.0580314	1119.63	54.3391	1044.98	96.21	0.583333	0.217307	0.408733	0.105547
60	2019-11-06	RRRS0001	Central	6	1	215	0.5	0.368	411.252	2.92382	140.656	25.3333		JMC1255	15.1778	2.92338	218.533	13.1497	8.21846	6.62852	313.954	132.277	95.6688	130.699	0.659333	0.223859	0.6	0.2
60	2019-11-06	RRRS0001	Central	7	2	242	0.5	0.323	462.898	2.59761	178.202	15.6667		JMC1264	20.3778	2.33132	702.533	158.978	0.941455	0.210395	1343.81	304.092	1578.71	709.444	1.15	0.2	0.224133	0.0467459
60	2019-11-06	RRRS0001	Central	8	3	264	0.5	0.559	504.979	2.38114	212.075	15		JMC1270	18.9111	1.91859	235.2	35.0679	2.73384	0.412942	449.891	67.0779	172.07	50.5039	0.593333	0.123648	0.243333	0.0568819
60	2019-11-06	RRRS0001	Central	9	4	288	0.25	0.293	550.886	2.18271	252.386	24		JMC1271	16.3333	0	246	21.744	5.50557	5.03668	516.839	273.872	418.888	374.375	0.583333	0.174801	0.435667	0.138044
60	2019-11-06	RRRS0001	Central	10	5	305	0.75	0.369	583.404	2.06105	283.061	19.6667		JMC1273	15.1333	1.9769	360.8	23.0802	1.74959	0.114272	690.138	44.1477	397.729	50.4029	0.533333	0.201384	0.3638	0.145729
60	2019-11-06	RRRS0001	Right	11	1	315	0.5	0.284	602.532	1.99562	301.927	16		JMC1280	22.0444	1.85738	279.867	32.3107	6.63357	6.49484	497.141	356.078	629.214	1581.28	0.633333	0.271825	0.362733	0.11249
60	2019-11-06	RRRS0001	Right	12	2	339	0.5	0.223	648.439	1.85434	349.688	21.6667		JMC1288	15.5778	3.40472	649.267	156.822	1.03247	0.274265	1241.92	299.969	1357.54	621.286	0.568667	0.0844485	0.317667	0.0810643
60	2019-11-06	RRRS0001	Right	13	3	318	0.5	0.212	608.27	1.97679	307.705	22.3333		JMC1297	12.6889	3.26931	568.067	63.9265	1.12139	0.132973	1086.6	122.279	994.363	219.475	0.766	0.32739	0.331267	0.0989959
60	2019-11-06	RRRS0001	Right	14	4	289	0.5	0.239	552.799	2.17516	254.142	20.3333		JMC1304	14.7778	4.18227	270.2	143.179	6.64846	10.5247	468.764	261.24	383.148	725.446	0.55	0.163299	0.320933	0.0729186
60	2019-11-06	RRRS0001	Right	15	5	302	0.5	0.368	577.666	2.08153	277.52	25.3333		JMC1306	22.5556	3.51434	723.933	183.198	3.08003	0.784006	735.4	6.66133	257.393	79.3794	0.624533	0.118038	0.286	0.069307
60	2019-11-06	JMC1271	Left	1	1	288	0.5	0.211	820.591	0.983709	834.181	16.3333		JMC1313	13.8444	3.2177	710.4	322.304	1.0864	0.474185	1358.85	616.503	1851.72	1567.05	0.983333	0.169967	0.250733	0.0367232
60	2019-11-06	JMC1271	Left	2	2	272	0.75	0.439	797.638	0.983299	811.185	16.3333		JMC1325	19.9556	2.23397	495.533	40.1246	1.27701	0.104484	947.856	76.7503	752.081	120.869	1.03333	0.201384	0.188733	0.0352316
60	2019-11-06	JMC1271	Left	3	3	284	0.75	0.337	774.684	1.08842	711.75	16.3333		JMC1327	15.1333	1.9769	577.267	36.3382	1.09334	0.0698317	1104.2	69.5076	1018.01	127.656	0.744667	0.303092	0.328533	0.0967477
60	2019-11-06	JMC1271	Left	4	4	245	0.5	0.284	795.725	0.889955	894.118	16.3333		JMC1336	17.3111	2.69558	649.267	156.822	1.03247	0.274265	1241.92	299.969	1357.54	621.286	0.568667	0.0844485	0.317667	0.0810643
60	2019-11-06	JMC1271	Left	5	5	257	0.5	0.263	726.864	1.11881	649.679	16.3333		JMC1337	18.2889	4.29102	235.2	35.0679	2.73384	0.412942	449.891	67.0779	172.07	50.5039	0.593333	0.123648	0.243333	0.0568819
60	2019-11-06	JMC1271	Central	6	1	247	1	0.425	757.469	0.990137	765.014	16.3333		JMC1339	19.0889	2.05649	723.933	183.198	0.606791	0.35403	1937.1	747.692	6079.73	5746.48	0.624533	0.118038	0.286	0.069307
60	2019-11-06	JMC1271	Central	7	2	259	0.75	0.363	753.643	1.04881	718.571	16.3333		JMC1345	18.8222	2.43696	235.2	35.0679	2.73384	0.412942	449.891	67.0779	172.07	50.5039	0.593333	0.123648	0.243333	0.0568819
60	2019-11-06	JMC1271	Central	8	3	246	0.5	0.484	747.905	1.01151	739.394	16.3333		JMC1348	18.5556	2.0929	141.533	29.3618	7.57643	6.7121	399.539	270.722	470.026	631.834	0.473333	0.0679869	0.254	0.0428641
60	2019-11-06	JMC1271	Central	9	4	235	0.5	0.684	200.844	13.3992	14.9893	16.3333		JMC1350	15.4667	3.50196	462.533	99.2189	4.35409	12.2856	1217.18	533.242	2471.05	2246.46	0.6	0.152753	0.343867	0.150454
60	2019-11-06	JMC1271	Central	10	5	242	0.5	0.683	202.757	13.5392	14.9756	16.3333		JMC1357	14.6444	2.13773	208.267	18.8413	3.04344	0.278312	398.372	36.0397	133.064	23.8828	0.606667	0.191369	0.357333	0.121022
60	2019-11-06	JMC1271	Right	11	1	217	0.5	0.427	208.495	11.4814	18.1594	16.3333		JMC1364	17.2444	2.32687	723.933	183.198	0.935425	0.288282	1384.74	350.422	1696.82	832.034	0.624533	0.118038	0.286	0.069307
60	2019-11-06	JMC1271	Right	12	2	224	0.75	0.544	221.885	10.4646	21.2035	16.3333		TZI	12.2222	1.66296	279.867	32.3107	8.32476	8.62683	452.923	251.031	295.18	340.856	0.633333	0.271825	0.362733	0.11249
60	2019-11-06	JMC1271	Right	13	3	232	0.5	0.327	231.449	9.96107	23.2353	16.3333
60	2019-11-06	JMC1271	Right	14	4	219	0.5	0.527	241.013	8.67145	27.7938	16.3333
60	2019-11-06	JMC1271	Right	15	5	223	0.25	0.537	271.618	6.95211	39.0698	16.3333
60	2019-11-06	JMC1280	Left	1	1	291	0.5	0.397	172.152	22.5838	7.62282	23.6667
60	2019-11-06	JMC1280	Left	2	2	286	0.75	0.483	413.165	3.85343	107.22	19.6667
60	2019-11-06	JMC1280	Left	3	3	276	0.5	0.349	353.868	5.06937	69.8051	20.6667
60	2019-11-06	JMC1280	Left	4	4	257	1	0.324	292.658	6.90143	42.4055	24.6667
60	2019-11-06	JMC1280	Left	5	5	246	0.75	0.262	172.152	19.0914	9.01723	24.3333
60	2019-11-06	JMC1280	Central	6	1	264	1	0.376	223.798	12.1233	18.4601	21
60	2019-11-06	JMC1280	Central	7	2	248	0.5	0.423	795.64	0.901045	883.02	20.6667
60	2019-11-06	JMC1280	Central	8	3	224	0.5	0.639	814.768	0.776083	1049.85	21.6667
60	2019-11-06	JMC1280	Central	9	4	320	0.5	0.483	263.966	10.5628	24.9901	20.3333
60	2019-11-06	JMC1280	Central	10	5	267	0.5	0.438	478.2	2.68547	178.07	23.6667
60	2019-11-06	JMC1280	Right	11	1	295	1.25	0.25	548.974	2.25137	243.84	19.6667
60	2019-11-06	JMC1280	Right	12	2	296	0.25	0.234	445.682	3.42743	130.034	20.6667
60	2019-11-06	JMC1280	Right	13	3	276	0.75	0.252	321.35	6.14723	52.2757	24.6667
60	2019-11-06	JMC1280	Right	14	4	364	0.25	0.237	539.41	2.87734	187.468	24.3333
60	2019-11-06	JMC1280	Right	15	5	288	0.5	0.294	1621.32	0.251988	6434.13	21
60	2019-11-06	RRRS0002	Left	1	1	291	0.5	0.397	212.321	14.8469	14.3007	10.6667
60	2019-11-06	RRRS0002	Left	2	2	286	0.75	0.483	235.274	11.8835	19.7984	10.6667
60	2019-11-06	RRRS0002	Left	3	3	276	0.5	0.349	407.426	3.82418	106.539	10.6667
60	2019-11-06	RRRS0002	Left	4	4	257	1	0.324	797.553	0.92927	858.257	14
60	2019-11-06	RRRS0002	Left	5	5	246	0.75	0.262	757.384	0.986349	767.866	14
60	2019-11-06	RRRS0002	Central	6	1	264	1	0.376	793.727	0.963805	823.535	10.6667
60	2019-11-06	RRRS0002	Central	7	2	248	0.5	0.423	260.141	8.42874	30.8636	10.6667
60	2019-11-06	RRRS0002	Central	8	3	224	0.5	0.639	376.822	3.62831	103.856	14
60	2019-11-06	RRRS0002	Central	9	4	320	0.5	0.483	292.658	8.59322	34.0569	14
60	2019-11-06	RRRS0002	Central	10	5	267	0.5	0.438	197.018	15.8207	12.4532	10.6667
60	2019-11-06	RRRS0002	Right	11	1	295	1.25	0.25	757.384	1.18282	640.322	10.6667
60	2019-11-06	RRRS0002	Right	12	2	296	0.25	0.234	793.727	1.08063	734.504	14
60	2019-11-06	RRRS0002	Right	13	3	276	0.75	0.252	141.547	31.6836	4.46752	14
60	2019-11-06	RRRS0002	Right	14	4	364	0.25	0.237	210.408	18.9106	11.1265	14
60	2019-11-06	RRRS0002	Right	15	5	288	0.5	0.294	560.45	2.10885	265.761	10.6667
60	2019-11-06	JMC1255	Left	1	1	234	0.74	0.25	447.595	2.68641	166.614	14.3333
60	2019-11-06	JMC1255	Left	2	2	217	0.73	0.5	145.373	23.6168	6.15548	10.6667
60	2019-11-06	JMC1255	Left	3	3	228	0.42	0.5	262.054	7.63629	34.3169	12
60	2019-11-06	JMC1255	Left	4	4	231	0.33	0.75	170.239	18.3325	9.28622	17.3333
60	2019-11-06	JMC1255	Left	5	5	221	0.51	0.5	336.653	4.48493	75.0631	18
60	2019-11-06	JMC1255	Central	6	1	217	0.79	0.5	225.71	9.7968	23.0392	14
60	2019-11-06	JMC1255	Central	7	2	219	0.47	0.75	451.421	2.47177	182.63	20.3333
60	2019-11-06	JMC1255	Central	8	3	221	0.54	0.5	361.519	3.88917	92.9553	16.3333
60	2019-11-06	JMC1255	Central	9	4	216	0.67	0.5	260.141	7.34116	35.4359	18.3333
60	2019-11-06	JMC1255	Central	10	5	213	0.96	1	294.571	5.64582	52.1751	14.3333
60	2019-11-06	JMC1255	Right	11	1	227	1.14	0.5	350.042	4.26101	82.1501	10.6667
60	2019-11-06	JMC1255	Right	12	2	199	0.77	0.5	153.024	19.5462	7.82885	12
60	2019-11-06	JMC1255	Right	13	3	181	0.79	1	219.972	8.60343	25.5679	17.3333
60	2019-11-06	JMC1255	Right	14	4	232	0.3	0.5	661.829	1.21822	543.277	18
60	2019-11-06	JMC1255	Right	15	5	222	0.73	0.75	369.17	3.74651	98.5371	14
60	2019-11-06	JMC1304	Left	1	1	429	0.75	0.287	153.024	42.1372	3.63156	9.66667
60	2019-11-06	JMC1304	Left	2	2	417	0.5	0.214	219.972	19.8212	11.0978	10
60	2019-11-06	JMC1304	Left	3	3	405	0.75	0.269	803.376	1.44326	556.639	11.3333
60	2019-11-06	JMC1304	Left	4	4	416	0.75	0.417	784.248	1.55566	504.126	20.3333
60	2019-11-06	JMC1304	Left	5	5	380	0.5	0.349	726.864	1.65427	439.388	16.3333
60	2019-11-06	JMC1304	Central	6	1	396	0.5	0.308	654.178	2.12829	307.372	18.3333
60	2019-11-06	JMC1304	Central	7	2	394	0.5	0.411	669.48	2.02185	331.123	20.3333
60	2019-11-06	JMC1304	Central	8	3	391	0.75	0.387	332.827	8.11834	40.997	17.6667
60	2019-11-06	JMC1304	Central	9	4	105	0.5	0.413	286.92	2.93356	97.806	11.6667
60	2019-11-06	JMC1304	Central	10	5	106	0.5	0.416	332.827	2.20088	151.225	9.66667
60	2019-11-06	JMC1304	Right	11	1	109	0.75	0.214	283.094	3.12818	90.4981	10
60	2019-11-06	JMC1304	Right	12	2	116	0.5	0.287	248.664	4.31479	57.6306	11.3333
60	2019-11-06	JMC1304	Right	13	3	121	0.25	0.279	244.838	4.64252	52.7382	20.3333
60	2019-11-06	JMC1304	Right	14	4	126	0.5	0.34	296.484	3.29682	89.9302	16.3333
60	2019-11-06	JMC1304	Right	15	5	142	0.25	0.223	994.656	0.330119	3013.02	18.3333
60	2019-11-06	JMC1240	Left	1	1	429	0.75	0.287	801.463	1.53609	521.754	12.3333
60	2019-11-06	JMC1240	Left	2	2	417	0.5	0.214	935.359	1.09624	853.24	14.3333
60	2019-11-06	JMC1240	Left	3	3	405	0.75	0.269	939.185	1.05604	889.345	16
60	2019-11-06	JMC1240	Left	4	4	416	0.75	0.417	822.504	1.41431	581.558	11
60	2019-11-06	JMC1240	Left	5	5	380	0.5	0.349	1166.81	2.32086	502.748	8
60	2019-11-06	JMC1240	Central	6	1	396	0.5	0.308	1040.56	2.32086	448.353	11
60	2019-11-06	JMC1240	Central	7	2	394	0.5	0.411	981.266	2.32086	422.803	14.6667
60	2019-11-06	JMC1240	Central	8	3	391	0.75	0.387	1184.02	2.32086	510.166	11
60	2019-11-06	JMC1240	Central	9	4	105	0.5	0.413	1040.56	2.32086	448.353	12
60	2019-11-06	JMC1240	Central	10	5	106	0.5	0.416	1201.24	2.32086	517.584	12.3333
60	2019-11-06	JMC1240	Right	11	1	109	0.75	0.214	1034.82	2.32086	445.88	14.3333
60	2019-11-06	JMC1240	Right	12	2	116	0.5	0.287	1308.36	2.32086	563.738	16
60	2019-11-06	JMC1240	Right	13	3	121	0.25	0.279	954.487	2.32086	411.265	11
60	2019-11-06	JMC1240	Right	14	4	126	0.5	0.34	1021.44	2.32086	440.111	8
60	2019-11-06	JMC1240	Right	15	5	142	0.25	0.223	1086.47	2.32086	468.133	11
60	2019-11-06	JMC1350	Left	1	1	510	0.5	0.23	153.024	50.0932	3.05478	10.6667
60	2019-11-06	JMC1350	Left	2	2	109	0.5	0.247	219.972	5.18107	42.4569	15
60	2019-11-06	JMC1350	Left	3	3	506	0.5	0.216	661.829	2.65697	249.091	11
60	2019-11-06	JMC1350	Left	4	4	503	0.75	0.224	1314.09	0.669951	1961.48	17.6667
60	2019-11-06	JMC1350	Left	5	5	429	0.5	0.282	983.179	1.02075	963.192	13.3333
60	2019-11-06	JMC1350	Central	6	1	402	0.5	0.279	1300.7	0.546509	2380.03	20.3333
60	2019-11-06	JMC1350	Central	7	2	486	0.75	0.359	2062	0.262898	7843.34	19
60	2019-11-06	JMC1350	Central	8	3	488	1	0.224	1184.02	0.800621	1478.88	18
60	2019-11-06	JMC1350	Central	9	4	506	0.5	0.434	1421.21	0.576185	2466.59	19
60	2019-11-06	JMC1350	Central	10	5	509	0.5	0.386	1143.85	0.894755	1278.4	10.6667
60	2019-11-06	JMC1350	Right	11	1	511	0.5	0.264	1537.89	0.496933	3094.77	15
60	2019-11-06	JMC1350	Right	12	2	498	0.75	0.289	1901.32	0.316844	6000.82	11
60	2019-11-06	JMC1350	Right	13	3	482	0.75	0.81	1855.42	0.322027	5761.68	17.6667
60	2019-11-06	JMC1350	Right	14	4	508	0.5	0.486	1172.55	0.849829	1379.74	13.3333
60	2019-11-06	JMC1350	Right	15	5	491	0.5	0.428	1346.61	0.622766	2162.31	20.3333
60	2019-11-06	JMC1254	Left	1	1	603	0.5	0.403	1153.42	1.04249	1106.41	24
60	2019-11-06	JMC1254	Left	2	2	601	0.75	0.434	1149.59	1.04596	1099.08	12.3333
60	2019-11-06	JMC1254	Left	3	3	597	0.75	0.297	1141.94	1.05297	1084.5	13
60	2019-11-06	JMC1254	Left	4	4	596	0.5	0.338	1140.03	1.05473	1080.87	10.6667
60	2019-11-06	JMC1254	Left	5	5	592	0.25	0.389	1132.38	1.06186	1066.41	9.33333
60	2019-11-06	JMC1254	Central	6	1	589	0.5	0.624	1126.64	1.06727	1055.63	13
60	2019-11-06	JMC1254	Central	7	2	588	0.5	0.284	1124.73	1.06908	1052.05	14
60	2019-11-06	JMC1254	Central	8	3	603	1	0.329	1153.42	1.04249	1106.41	14
60	2019-11-06	JMC1254	Central	9	4	601	0.5	0.454	1149.59	1.04596	1099.08	14
60	2019-11-06	JMC1254	Central	10	5	602	0.25	0.514	1151.51	1.04422	1102.74	24
60	2019-11-06	JMC1254	Right	11	1	512	0.75	0.589	979.354	1.22777	797.665	12.3333
60	2019-11-06	JMC1254	Right	12	2	516	0.5	0.487	987.005	1.21826	810.178	13
60	2019-11-06	JMC1254	Right	13	3	592	0.5	0.41	1132.38	1.06186	1066.41	10.6667
60	2019-11-06	JMC1254	Right	14	4	597	0.5	0.297	1141.94	1.05297	1084.5	9.33333
60	2019-11-06	JMC1254	Right	15	5	591	1	0.282	1130.46	1.06366	1062.81	13
60	2019-11-06	JMC1327	Left	1	1	498	0.75	0.477	952.574	1.26229	754.64	12.3333
60	2019-11-06	JMC1327	Left	2	2	644	1.5	0.213	1231.84	0.976119	1261.98	14
60	2019-11-06	JMC1327	Left	3	3	539	0.75	0.221	1031	1.16627	884.012	15
60	2019-11-06	JMC1327	Left	4	4	578	0.54	0.431	1105.6	1.08758	1016.57	16.3333
60	2019-11-06	JMC1327	Left	5	5	589	0.73	0.329	1126.64	1.06727	1055.63	14.3333
60	2019-11-06	JMC1327	Central	6	1	566	0.8	0.219	1082.64	1.11064	974.796	19
60	2019-11-06	JMC1327	Central	7	2	571	0.49	0.241	1092.21	1.10091	992.095	14.3333
60	2019-11-06	JMC1327	Central	8	3	583	0.61	0.344	1115.16	1.07825	1034.23	17
60	2019-11-06	JMC1327	Central	9	4	552	1.2	0.229	1055.87	1.13881	927.169	13.6667
60	2019-11-06	JMC1327	Central	10	5	545	0.45	0.241	1042.48	1.15343	903.803	12.3333
60	2019-11-06	JMC1327	Right	11	1	569	0.5	0.487	1088.38	1.10478	985.157	14
60	2019-11-06	JMC1327	Right	12	2	574	0.54	0.429	1097.95	1.09516	1002.55	15
60	2019-11-06	JMC1327	Right	13	3	599	0.6	0.319	1145.77	1.04945	1091.78	16.3333
60	2019-11-06	JMC1327	Right	14	4	614	0.51	0.429	1174.46	1.02381	1147.14	14.3333
60	2019-11-06	JMC1327	Right	15	5	638	1.2	0.319	1220.37	0.985299	1238.57	19
60	2019-11-06	JMC1273	Left	1	1	390	0.5	0.43	745.992	1.61185	462.818	12.3333
60	2019-11-06	JMC1273	Left	2	2	371	0.5	0.299	709.649	1.6944	418.821	14
60	2019-11-06	JMC1273	Left	3	3	342	0.5	0.343	654.178	1.83807	355.904	15
60	2019-11-06	JMC1273	Left	4	4	345	0.5	0.398	659.916	1.82209	362.175	16.3333
60	2019-11-06	JMC1273	Left	5	5	397	0.5	0.356	759.382	1.58343	479.581	14.3333
60	2019-11-06	JMC1273	Central	6	1	371	0.75	0.284	709.649	1.6944	418.821	19
60	2019-11-06	JMC1273	Central	7	2	316	0.75	0.293	604.445	1.98931	303.847	14.3333
60	2019-11-06	JMC1273	Central	8	3	364	0.25	0.84	696.259	1.72698	403.166	17
60	2019-11-06	JMC1273	Central	9	4	324	0.5	0.423	619.747	1.94019	319.426	13.6667
60	2019-11-06	JMC1273	Central	10	5	371	0.5	0.287	709.649	1.6944	418.821	12.3333
60	2019-11-06	JMC1273	Right	11	1	360	1	0.383	688.608	1.74617	394.354	14
60	2019-11-06	JMC1273	Right	12	2	365	0.5	0.289	698.172	1.72225	405.384	15
60	2019-11-06	JMC1273	Right	13	3	355	0.25	0.197	679.044	1.77076	383.475	16.3333
60	2019-11-06	JMC1273	Right	14	4	345	0.25	0.211	659.916	1.82209	362.175	14.3333
60	2019-11-06	JMC1273	Right	15	5	396	0.75	0.424	757.469	1.58743	477.168	19
60	2019-11-06	JMC1357	Left	1	1	176	1	0.27	336.653	3.57171	94.2554	12.3333
60	2019-11-06	JMC1357	Left	2	2	189	0.9	0.28	361.519	3.32604	108.694	14.3333
60	2019-11-06	JMC1357	Left	3	3	215	1	0.38	411.252	2.92382	140.656	17.3333
60	2019-11-06	JMC1357	Left	4	4	226	0.7	0.32	432.293	2.78151	155.417	11.3333
60	2019-11-06	JMC1357	Left	5	5	231	0.5	0.41	441.857	2.7213	162.37	14
60	2019-11-06	JMC1357	Central	6	1	193	0.5	0.51	369.17	3.2571	113.343	17.6667
60	2019-11-06	JMC1357	Central	7	2	189	0.5	0.34	361.519	3.32604	108.694	15.6667
60	2019-11-06	JMC1357	Central	8	3	205	0.5	0.33	392.124	3.06644	127.876	14.3333
60	2019-11-06	JMC1357	Central	9	4	216	0.5	0.59	413.165	2.91028	141.967	12.3333
60	2019-11-06	JMC1357	Central	10	5	193	0.5	0.19	369.17	3.2571	113.343	14.3333
60	2019-11-06	JMC1357	Right	11	1	233	0.5	0.55	445.682	2.69794	165.193	17.3333
60	2019-11-06	JMC1357	Right	12	2	216	0.4	0.22	413.165	2.91028	141.967	11.3333
60	2019-11-06	JMC1357	Right	13	3	239	0.5	0.29	457.159	2.63021	173.811	14
60	2019-11-06	JMC1357	Right	14	4	216	0.5	0.21	413.165	2.91028	141.967	17.6667
60	2019-11-06	JMC1357	Right	15	5	187	0.6	0.47	357.694	3.36161	106.405	15.6667
60	2019-11-06	JMC1345	Left	1	1	293	0.9	0.28	560.45	2.14546	261.226	14
60	2019-11-06	JMC1345	Left	2	2	277	0.7	0.27	529.846	2.26939	233.475	20.3333
60	2019-11-06	JMC1345	Left	3	3	187	0.5	0.25	357.694	3.36161	106.405	18.6667
60	2019-11-06	JMC1345	Left	4	4	281	0.5	0.17	537.497	2.23708	240.267	20
60	2019-11-06	JMC1345	Left	5	5	236	0.5	0.23	451.421	2.66365	169.475	17.3333
60	2019-11-06	JMC1345	Central	6	1	251	0.5	0.27	480.113	2.50447	191.703	18
60	2019-11-06	JMC1345	Central	7	2	273	0.5	0.23	522.194	2.30264	226.781	22.3333
60	2019-11-06	JMC1345	Central	8	3	254	0.7	0.25	485.851	2.47488	196.313	21
60	2019-11-06	JMC1345	Central	9	4	243	0.5	0.27	464.81	2.58692	179.677	14
60	2019-11-06	JMC1345	Central	10	5	235	0.7	0.26	449.508	2.67498	168.042	20.3333
60	2019-11-06	JMC1345	Right	11	1	191	0.7	0.21	365.345	3.29121	111.006	18.6667
60	2019-11-06	JMC1345	Right	12	2	188	0.5	0.37	359.606	3.34373	107.547	20
60	2019-11-06	JMC1345	Right	13	3	197	0.5	0.27	376.822	3.19097	118.09	17.3333
60	2019-11-06	JMC1345	Right	14	4	207	0.5	0.22	395.95	3.03682	130.383	18
60	2019-11-06	JMC1345	Right	15	5	215	0.7	0.1	411.252	2.92382	140.656	22.3333
60	2019-11-06	JMC1270	Left	1	1	293	0.9	0.28	560.45	2.14546	261.226	20.3333
60	2019-11-06	JMC1270	Left	2	2	277	0.7	0.27	529.846	2.26939	233.475	19
60	2019-11-06	JMC1270	Left	3	3	187	0.5	0.25	357.694	3.36161	106.405	15.6667
60	2019-11-06	JMC1270	Left	4	4	281	0.5	0.17	537.497	2.23708	240.267	20.3333
60	2019-11-06	JMC1270	Left	5	5	236	0.5	0.23	451.421	2.66365	169.475	21
60	2019-11-06	JMC1270	Central	6	1	251	0.5	0.27	480.113	2.50447	191.703	16.3333
60	2019-11-06	JMC1270	Central	7	2	273	0.5	0.23	522.194	2.30264	226.781	18
60	2019-11-06	JMC1270	Central	8	3	254	0.7	0.25	485.851	2.47488	196.313	20
60	2019-11-06	JMC1270	Central	9	4	243	0.5	0.27	464.81	2.58692	179.677	20.3333
60	2019-11-06	JMC1270	Central	10	5	235	0.7	0.26	449.508	2.67498	168.042	20.3333
60	2019-11-06	JMC1270	Right	11	1	191	0.7	0.21	365.345	3.29121	111.006	19
60	2019-11-06	JMC1270	Right	12	2	188	0.5	0.37	359.606	3.34373	107.547	15.6667
60	2019-11-06	JMC1270	Right	13	3	197	0.5	0.27	376.822	3.19097	118.09	20.3333
60	2019-11-06	JMC1270	Right	14	4	207	0.5	0.22	395.95	3.03682	130.383	21
60	2019-11-06	JMC1270	Right	15	5	215	0.7	0.1	411.252	2.92382	140.656	16.3333
60	2019-11-06	JMC1337	Left	1	1	293	0.9	0.28	560.45	2.14546	261.226	12.3333
60	2019-11-06	JMC1337	Left	2	2	277	0.7	0.27	529.846	2.26939	233.475	16
60	2019-11-06	JMC1337	Left	3	3	187	0.5	0.25	357.694	3.36161	106.405	17.3333
60	2019-11-06	JMC1337	Left	4	4	281	0.5	0.17	537.497	2.23708	240.267	21.6667
60	2019-11-06	JMC1337	Left	5	5	236	0.5	0.23	451.421	2.66365	169.475	16.3333
60	2019-11-06	JMC1337	Central	6	1	251	0.5	0.27	480.113	2.50447	191.703	23
60	2019-11-06	JMC1337	Central	7	2	273	0.5	0.23	522.194	2.30264	226.781	28.6667
60	2019-11-06	JMC1337	Central	8	3	254	0.7	0.25	485.851	2.47488	196.313	17
60	2019-11-06	JMC1337	Central	9	4	243	0.5	0.27	464.81	2.58692	179.677	15.3333
60	2019-11-06	JMC1337	Central	10	5	235	0.7	0.26	449.508	2.67498	168.042	12.3333
60	2019-11-06	JMC1337	Right	11	1	191	0.7	0.21	365.345	3.29121	111.006	16
60	2019-11-06	JMC1337	Right	12	2	188	0.5	0.37	359.606	3.34373	107.547	17.3333
60	2019-11-06	JMC1337	Right	13	3	197	0.5	0.27	376.822	3.19097	118.09	21.6667
60	2019-11-06	JMC1337	Right	14	4	207	0.5	0.22	395.95	3.03682	130.383	16.3333
60	2019-11-06	JMC1337	Right	15	5	215	0.7	0.1	411.252	2.92382	140.656	23
60	2019-11-06	JMC1245	Left	1	1	345	0.5	0.31	659.916	1.82209	362.175	12.3333
60	2019-11-06	JMC1245	Left	2	2	229	1	0.2	438.031	2.74507	159.57	10.3333
60	2019-11-06	JMC1245	Left	3	3	237	0.6	0.47	453.334	2.65241	170.914	10.6667
60	2019-11-06	JMC1245	Left	4	4	189	0.5	0.27	361.519	3.32604	108.694	11.6667
60	2019-11-06	JMC1245	Left	5	5	253	0.6	0.53	483.938	2.48467	194.77	11
60	2019-11-06	JMC1245	Central	6	1	197	0.5	0.42	376.822	3.19097	118.09	15.6667
60	2019-11-06	JMC1245	Central	7	2	203	1	0.22	388.298	3.09665	125.393	11.6667
60	2019-11-06	JMC1245	Central	8	3	312	0.6	0.25	596.794	2.01481	296.203	11
60	2019-11-06	JMC1245	Central	9	4	289	0.9	0.22	552.799	2.17516	254.142	12.3333
60	2019-11-06	JMC1245	Central	10	5	308	0.5	0.38	589.142	2.04098	288.657	10.3333
60	2019-11-06	JMC1245	Right	11	1	271	0.5	0.34	518.369	2.31963	223.47	10.6667
60	2019-11-06	JMC1245	Right	12	2	189	0.3	0.35	361.519	3.32604	108.694	11.6667
60	2019-11-06	JMC1245	Right	13	3	199	0.5	0.26	380.647	3.1589	120.5	11
60	2019-11-06	JMC1245	Right	14	4	209	0.5	0.25	399.775	3.00775	132.915	15.6667
60	2019-11-06	JMC1245	Right	15	5	236	0.5	0.38	451.421	2.66365	169.475	11.6667
60	2019-11-06	JMC1208	Left	1	1	346	0.75	0.472	661.829	1.81682	364.278	9.33333
60	2019-11-06	JMC1208	Left	2	2	687	0.5	0.213	1314.09	0.915023	1436.13	10
60	2019-11-06	JMC1208	Left	3	3	514	0.75	0.221	983.179	1.223	803.909	10
60	2019-11-06	JMC1208	Left	4	4	680	0.64	0.328	1300.7	0.924442	1407.01	12.3333
60	2019-11-06	JMC1208	Left	5	5	1078	0.8	0.224	2062	0.583136	3536.05	9
60	2019-11-06	JMC1208	Central	6	1	619	0.6	0.219	1184.02	1.01554	1165.9	10.6667
60	2019-11-06	JMC1208	Central	7	2	743	0.52	0.231	1421.21	0.846058	1679.8	11.3333
60	2019-11-06	JMC1208	Central	8	3	598	0.7	0.341	1143.85	1.05121	1088.14	9.33333
60	2019-11-06	JMC1208	Central	9	4	804	0.73	0.234	1537.89	0.781867	1966.95	9.33333
60	2019-11-06	JMC1208	Central	10	5	994	0.68	0.314	1901.32	0.632415	3006.45	10
60	2019-11-06	JMC1208	Right	11	1	970	0.57	0.229	1855.42	0.648063	2863.02	10
60	2019-11-06	JMC1208	Right	12	2	613	0.58	0.314	1172.55	1.02548	1143.41	12.3333
60	2019-11-06	JMC1208	Right	13	3	704	0.6	0.289	1346.61	0.892927	1508.09	9
60	2019-11-06	JMC1208	Right	14	4	810	0.63	0.342	1549.37	0.776075	1996.42	10.6667
60	2019-11-06	JMC1208	Right	15	5	699	0.318	0.319	1337.05	0.899314	1486.74	11.3333
60	2019-11-06	JMC1348	Left	1	1	102	0.5	0.27	700	0.477799	1466.55	16
60	2019-11-06	JMC1348	Left	2	2	120	0.5	0.18	700	0.560082	1253.36	21.3333
60	2019-11-06	JMC1348	Left	3	3	138	0.5	0.21	120.506	21.8568	5.51345	17.6667
60	2019-11-06	JMC1348	Left	4	4	165	0.6	0.31	172.152	12.8052	13.4439	15.6667
60	2019-11-06	JMC1348	Left	5	5	102	0.5	0.23	214.234	5.11155	41.9116	18.6667
60	2019-11-06	JMC1348	Central	6	1	171	0.4	0.21	229.536	7.46487	30.7488	18.3333
60	2019-11-06	JMC1348	Central	7	2	150	0.4	0.21	751.646	0.610651	1230.89	21
60	2019-11-06	JMC1348	Central	8	3	187	0.4	0.27	214.234	9.37118	22.8609	20.3333
60	2019-11-06	JMC1348	Central	9	4	104	0.5	0.32	183.629	7.09381	25.8858	21.6667
60	2019-11-06	JMC1348	Central	10	5	152	0.5	0.23	143.46	16.9867	8.44542	16
60	2019-11-06	JMC1348	Right	11	1	177	0.5	0.27	722.954	0.778897	928.176	21.3333
60	2019-11-06	JMC1348	Right	12	2	113	0.5	0.24	722.954	3.28323	220.196	17.6667
60	2019-11-06	JMC1348	Right	13	3	152	0.5	0.24	147.286	16.1158	9.13923	15.6667
60	2019-11-06	JMC1348	Right	14	4	177	0.5	0.32	195.106	10.6945	18.2435	18.6667
60	2019-11-06	JMC1348	Right	15	5	113	0.3	0.3	772.686	0.435311	1775.02	18.3333
60	2019-11-06	JMC1339	Left	1	1	346	0.75	0.472	2186.1	0.166519	13128.2	18.3333
60	2019-11-06	JMC1339	Left	2	2	687	0.5	0.213	2257.6	0.310021	7282.1	21
60	2019-11-06	JMC1339	Left	3	3	514	0.75	0.221	1930.4	0.317246	6084.87	20.3333
60	2019-11-06	JMC1339	Left	4	4	680	0.64	0.328	1276.8	0.959381	1330.86	21.6667
60	2019-11-06	JMC1339	Left	5	5	1078	0.8	0.224	3529.6	0.199019	17734.9	16
60	2019-11-06	JMC1339	Central	6	1	619	0.6	0.219	1067.2	1.25005	853.727	21.3333
60	2019-11-06	JMC1339	Central	7	2	743	0.52	0.231	1374.4	0.90467	1519.23	17.6667
60	2019-11-06	JMC1339	Central	8	3	598	0.7	0.341	1835.2	0.408378	4493.88	15.6667
60	2019-11-06	JMC1339	Central	9	4	804	0.73	0.234	3064	0.196973	15555.4	18.6667
60	2019-11-06	JMC1339	Central	10	5	994	0.68	0.314	3140.8	0.231757	13552.1	18.3333
60	2019-11-06	JMC1339	Right	11	1	970	0.57	0.229	1988.8	0.56405	3525.93	18.3333
60	2019-11-06	JMC1339	Right	12	2	613	0.58	0.314	1172.55	1.02548	1143.41	21
60	2019-11-06	JMC1339	Right	13	3	704	0.6	0.289	1346.61	0.892927	1508.09	20.3333
60	2019-11-06	JMC1339	Right	14	4	810	0.63	0.342	1549.37	0.776075	1996.42	21.6667
60	2019-11-06	JMC1339	Right	15	5	699	0.318	0.319	1337.05	0.899314	1486.74	16
60	2019-11-06	JMC1288	Left	1	1	398	0.5	0.425	761.294	1.57945	482	12.3333
60	2019-11-06	JMC1288	Left	2	2	493	0.5	0.215	943.01	1.27509	739.562	14
60	2019-11-06	JMC1288	Left	3	3	519	0.7	0.26	992.743	1.21122	819.626	12.3333
60	2019-11-06	JMC1288	Left	4	4	559	0.5	0.205	1069.26	1.12455	950.833	16.3333
60	2019-11-06	JMC1288	Left	5	5	398	0.6	0.301	761.294	1.57945	482	12.3333
60	2019-11-06	JMC1288	Central	6	1	619	0.7	0.413	1184.02	1.01554	1165.9	19.6667
60	2019-11-06	JMC1288	Central	7	2	711	0.5	0.214	1360	0.884136	1538.23	23
60	2019-11-06	JMC1288	Central	8	3	694	0.54	0.304	1327.48	0.905794	1465.55	19
60	2019-11-06	JMC1288	Central	9	4	609	0.63	0.251	1164.9	1.03222	1128.54	17.6667
60	2019-11-06	JMC1288	Central	10	5	794	0.51	0.343	1518.76	0.791714	1918.32	12.3333
60	2019-11-06	JMC1288	Right	11	1	914	0.63	0.418	1748.3	0.687769	2541.99	14
60	2019-11-06	JMC1288	Right	12	2	823	0.54	0.421	1574.23	0.763816	2061.01	12.3333
60	2019-11-06	JMC1288	Right	13	3	841	0.43	0.342	1608.66	0.747468	2152.15	16.3333
60	2019-11-06	JMC1288	Right	14	4	794	0.54	0.409	1518.76	0.791714	1918.32	12.3333
60	2019-11-06	JMC1288	Right	15	5	573	0.71	0.244	1096.03	1.09707	999.057	19.6667
60	2019-11-06	JMC1306	Left	1	1	346	0.75	0.472	734	1.47711	496.917	19.6667
60	2019-11-06	JMC1306	Left	2	2	687	0.5	0.213	729	2.97324	245.187	17
60	2019-11-06	JMC1306	Left	3	3	514	0.75	0.221	735	2.18835	335.87	25.6667
60	2019-11-06	JMC1306	Left	4	4	680	0.64	0.328	728	2.95103	246.693	20.6667
60	2019-11-06	JMC1306	Left	5	5	1078	0.8	0.224	731	4.63993	157.545	25.6667
60	2019-11-06	JMC1306	Central	6	1	619	0.6	0.219	744	2.57201	289.268	27.6667
60	2019-11-06	JMC1306	Central	7	2	743	0.52	0.231	739	3.12916	236.166	23
60	2019-11-06	JMC1306	Central	8	3	598	0.7	0.341	746	2.47145	301.847	19.6667
60	2019-11-06	JMC1306	Central	9	4	804	0.73	0.234	731	3.46058	211.236	19.6667
60	2019-11-06	JMC1306	Central	10	5	994	0.68	0.314	744	4.13017	180.138	17
60	2019-11-06	JMC1306	Right	11	1	970	0.57	0.229	732	4.16368	175.806	25.6667
60	2019-11-06	JMC1306	Right	12	2	613	0.58	0.314	729	2.65298	274.786	20.6667
60	2019-11-06	JMC1306	Right	13	3	704	0.6	0.289	726	3.07204	236.325	25.6667
60	2019-11-06	JMC1306	Right	14	4	810	0.63	0.342	737	3.42987	214.877	27.6667
60	2019-11-06	JMC1306	Right	15	5	699	0.318	0.319	746	2.88887	258.233	23
60	2019-11-06	JMC1264	Left	1	1	1010	1	0.226	1931.93	0.622397	3104.01	21.6667
60	2019-11-06	JMC1264	Left	2	2	850	1	0.257	1625.88	0.739554	2198.46	24.3333
60	2019-11-06	JMC1264	Left	3	3	760	1	0.225	1453.73	0.827133	1757.55	19
60	2019-11-06	JMC1264	Left	4	4	848	1.5	0.234	1622.05	0.741298	2188.13	21
60	2019-11-06	JMC1264	Left	5	5	950	1.5	0.168	1817.16	0.661706	2746.17	16.3333
60	2019-11-06	JMC1264	Central	6	1	780	1	0.177	1491.98	0.805924	1851.27	21.6667
60	2019-11-06	JMC1264	Central	7	2	730	1	0.205	1396.34	0.861124	1621.54	20
60	2019-11-06	JMC1264	Central	8	3	680	1	0.236	1300.7	0.924442	1407.01	18
60	2019-11-06	JMC1264	Central	9	4	690	1	0.33	1319.83	0.911045	1448.7	19.6667
60	2019-11-06	JMC1264	Central	10	5	530	1	0.311	1013.78	1.18608	854.737	21.6667
60	2019-11-06	JMC1264	Right	11	1	570	1.25	0.244	1090.3	1.10284	988.623	24.3333
60	2019-11-06	JMC1264	Right	12	2	520	1.25	0.208	994.656	1.20889	822.787	19
60	2019-11-06	JMC1264	Right	13	3	490	1	0.165	937.272	1.2829	730.589	21
60	2019-11-06	JMC1264	Right	14	4	510	1.5	0.198	975.528	1.23259	791.446	16.3333
60	2019-11-06	JMC1264	Right	15	5	620	1.25	0.178	1185.94	1.0139	1169.67	21.6667
60	2019-11-06	JMC1325	Left	1	1	455	1	0.159	870.324	1.38158	629.946	16
60	2019-11-06	JMC1325	Left	2	2	438	1.25	0.171	837.806	1.43521	583.753	21
60	2019-11-06	JMC1325	Left	3	3	540	1	0.141	1032.91	1.16411	887.296	19
60	2019-11-06	JMC1325	Left	4	4	524	1	0.227	1002.31	1.19966	835.494	20.3333
60	2019-11-06	JMC1325	Left	5	5	460	1.25	0.256	879.888	1.36657	643.868	24.3333
60	2019-11-06	JMC1325	Central	6	1	520	1.25	0.175	994.656	1.20889	822.787	19.3333
60	2019-11-06	JMC1325	Central	7	2	535	1	0.121	1023.35	1.17499	870.94	19.6667
60	2019-11-06	JMC1325	Central	8	3	456	0.75	0.197	872.237	1.37855	632.719	20
60	2019-11-06	JMC1325	Central	9	4	525	0.75	0.188	1004.22	1.19737	838.686	16
60	2019-11-06	JMC1325	Central	10	5	488	1	0.168	933.446	1.28816	724.637	21
60	2019-11-06	JMC1325	Right	11	1	530	1.5	0.219	1013.78	1.18608	854.737	19
60	2019-11-06	JMC1325	Right	12	2	565	0.75	0.195	1080.73	1.1126	971.354	20.3333
60	2019-11-06	JMC1325	Right	13	3	475	1	0.196	908.58	1.32341	686.544	24.3333
60	2019-11-06	JMC1325	Right	14	4	432	1	0.241	826.33	1.45514	567.869	19.3333
60	2019-11-06	JMC1325	Right	15	5	490	1	0.177	937.272	1.2829	730.589	19.6667
60	2019-11-06	JMC1297	Left	1	1	430	0.74	0.322	822.504	1.46191	562.623	11
60	2019-11-06	JMC1297	Left	2	2	610	1.2	0.219	1166.81	1.03053	1132.25	9
60	2019-11-06	JMC1297	Left	3	3	544	0.6	0.241	1040.56	1.15555	900.489	10.3333
60	2019-11-06	JMC1297	Left	4	4	513	0.49	0.487	981.266	1.22538	800.784	11.3333
60	2019-11-06	JMC1297	Left	5	5	619	1.2	0.213	1184.02	1.01554	1165.9	11
60	2019-11-06	JMC1297	Central	6	1	544	0.5	0.429	1040.56	1.15555	900.489	18
60	2019-11-06	JMC1297	Central	7	2	628	0.54	0.319	1201.24	1.00099	1200.05	17.6667
60	2019-11-06	JMC1297	Central	8	3	541	0.51	0.234	1034.82	1.16196	890.585	11
60	2019-11-06	JMC1297	Central	9	4	684	0.75	0.149	1308.36	0.919036	1423.62	9
60	2019-11-06	JMC1297	Central	10	5	499	1.5	0.431	954.487	1.25976	757.673	10.3333
60	2019-11-06	JMC1297	Right	11	1	534	0.73	0.334	1021.44	1.17719	867.688	11.3333
60	2019-11-06	JMC1297	Right	12	2	568	0.51	0.419	1086.47	1.10673	981.697	11
60	2019-11-06	JMC1297	Right	13	3	629	1.21	0.321	1203.15	0.999397	1203.88	18
60	2019-11-06	JMC1297	Right	14	4	641	0.5	0.429	1226.1	0.980688	1250.25	17.6667
60	2019-11-06	JMC1297	Right	15	5	537	0.51	0.422	1027.17	1.17062	877.464	13.6667
60	2019-11-06	JMC1313	Left	1	1	1334	1	0.257	2551.68	0.47123	5414.93	11.6667
60	2019-11-06	JMC1313	Left	2	2	580	1	0.252	1109.42	1.08383	1023.62	11
60	2019-11-06	JMC1313	Left	3	3	924	1.25	0.296	1767.43	0.680325	2597.91	9.33333
60	2019-11-06	JMC1313	Left	4	4	336	0.75	0.236	642.701	1.8709	343.526	15.3333
60	2019-11-06	JMC1313	Left	5	5	413	0.75	0.25	789.986	1.52208	519.016	12.3333
60	2019-11-06	JMC1313	Central	6	1	465	1.25	0.28	889.452	1.35187	657.941	17.6667
60	2019-11-06	JMC1313	Central	7	2	313	1	0.239	598.706	2.00837	298.105	11.6667
60	2019-11-06	JMC1313	Central	8	3	489	1.25	0.228	935.359	1.28552	727.61	11
60	2019-11-06	JMC1313	Central	9	4	914	1	0.25	1748.3	0.687769	2541.99	9.33333
60	2019-11-06	JMC1313	Central	10	5	1112	1	0.301	2127.03	0.565306	3762.62	15.3333
60	2019-11-06	JMC1313	Right	11	1	1050	1	0.236	2008.44	0.598686	3354.74	12.3333
60	2019-11-06	JMC1313	Right	12	2	454	0.75	0.198	868.411	1.38463	627.181	17.6667
60	2019-11-06	JMC1313	Right	13	3	516	1	0.318	987.005	1.21826	810.178	19.3333
60	2019-11-06	JMC1313	Right	14	4	1136	1	0.171	2172.94	0.553363	3926.79	18
60	2019-11-06	JMC1313	Right	15	5	620	0.75	0.249	1185.94	1.0139	1169.67	15.6667
60	2019-11-06	JMC1336	Left	1	1	398	0.5	0.425	761.294	1.57945	482	11.3333
60	2019-11-06	JMC1336	Left	2	2	493	0.5	0.215	943.01	1.27509	739.562	17
60	2019-11-06	JMC1336	Left	3	3	519	0.7	0.26	992.743	1.21122	819.626	17.3333
60	2019-11-06	JMC1336	Left	4	4	559	0.5	0.205	1069.26	1.12455	950.833	20
60	2019-11-06	JMC1336	Left	5	5	398	0.6	0.301	761.294	1.57945	482	18
60	2019-11-06	JMC1336	Central	6	1	619	0.7	0.413	1184.02	1.01554	1165.9	20.3333
60	2019-11-06	JMC1336	Central	7	2	711	0.5	0.214	1360	0.884136	1538.23	18
60	2019-11-06	JMC1336	Central	8	3	694	0.54	0.304	1327.48	0.905794	1465.55	15.6667
60	2019-11-06	JMC1336	Central	9	4	609	0.63	0.251	1164.9	1.03222	1128.54	11.3333
60	2019-11-06	JMC1336	Central	10	5	794	0.51	0.343	1518.76	0.791714	1918.32	17
60	2019-11-06	JMC1336	Right	11	1	914	0.63	0.418	1748.3	0.687769	2541.99	17.3333
60	2019-11-06	JMC1336	Right	12	2	823	0.54	0.421	1574.23	0.763816	2061.01	20
60	2019-11-06	JMC1336	Right	13	3	841	0.43	0.342	1608.66	0.747468	2152.15	18
60	2019-11-06	JMC1336	Right	14	4	794	0.54	0.409	1518.76	0.791714	1918.32	20.3333
60	2019-11-06	JMC1336	Right	15	5	573	0.71	0.244	1096.03	1.09707	999.057	18
60	2019-11-06	JMC1364	Left	1	1	346	0.75	0.472	661.829	1.81682	364.278	14.3333
60	2019-11-06	JMC1364	Left	2	2	687	0.5	0.213	1314.09	0.915023	1436.13	16
60	2019-11-06	JMC1364	Left	3	3	514	0.75	0.221	983.179	1.223	803.909	20.3333
60	2019-11-06	JMC1364	Left	4	4	680	0.64	0.328	1300.7	0.924442	1407.01	19
60	2019-11-06	JMC1364	Left	5	5	1078	0.8	0.224	2062	0.583136	3536.05	13.6667
60	2019-11-06	JMC1364	Central	6	1	619	0.6	0.219	1184.02	1.01554	1165.9	17.6667
60	2019-11-06	JMC1364	Central	7	2	743	0.52	0.231	1421.21	0.846058	1679.8	18.3333
60	2019-11-06	JMC1364	Central	8	3	598	0.7	0.341	1143.85	1.05121	1088.14	20
60	2019-11-06	JMC1364	Central	9	4	804	0.73	0.234	1537.89	0.781867	1966.95	14.3333
60	2019-11-06	JMC1364	Central	10	5	994	0.68	0.314	1901.32	0.632415	3006.45	16
60	2019-11-06	JMC1364	Right	11	1	970	0.57	0.229	1855.42	0.648063	2863.02	20.3333
60	2019-11-06	JMC1364	Right	12	2	613	0.58	0.314	1172.55	1.02548	1143.41	19
60	2019-11-06	JMC1364	Right	13	3	704	0.6	0.289	1346.61	0.892927	1508.09	13.6667
60	2019-11-06	JMC1364	Right	14	4	810	0.63	0.342	1549.37	0.776075	1996.42	17.6667
60	2019-11-06	JMC1364	Right	15	5	699	0.318	0.319	1337.05	0.899314	1486.74	18.3333

## Sheet: Physiology 
Accession	Photo	Cond	Ci	Trmmol	EUA		Accession	Mean Photo	SD Photo	Mean Cond	SD Cond	Mean Ci	SD Ci	Mean EUA	SD EUA	Mean Trmmol	SD Trmmol
JMC1364	29.9293	1.03123	294.834	7.47431	4.00429		IZAM	23.2746	6.37542	0.466231	0.217129	261.229	16.0508	3.92696	0.353845	5.95367	1.55509
JMC1364	29.8196	1.02745	294.959	7.46883	3.99254		JMC1271	23.5192	4.04364	0.558119	0.172348	277.701	10.2578	3.46243	0.210378	6.80744	1.14716
JMC1364	30.0237	1.03042	294.661	7.47603	4.016		JMC1280	25.3042	4.66003	0.642109	0.147437	283.567	6.23067	3.51114	0.360247	7.15168	0.580248
JMC1364	30.1192	1.02981	294.4	7.47348	4.03015		TZI	27.5497	2.42335	0.631886	0.147615	271.554	10.1307	4.03578	0.246093	6.85314	0.744079
JMC1364	30.1625	1.02943	294.285	7.47172	4.0369		JMC1255	23.1956	3.68532	0.582404	0.194463	281.494	13.088	3.50147	0.308357	6.67579	1.19464
JMC1364	19.3183	0.403152	281.376	5.00946	3.85637		JMC1304	25.5322	3.23368	0.673557	0.126939	284.029	16.4194	3.56188	0.506829	7.21997	0.639672
JMC1364	19.3451	0.403181	281.205	5.01009	3.86122		JMC1240	22.2518	4.97341	0.461206	0.177428	264.633	23.6484	3.81798	0.5822	5.96473	1.48473
JMC1364	19.2691	0.401932	281.394	5.00328	3.8513		JMC1350	24.7347	1.81154	0.494127	0.0822154	265.926	10.1588	3.82096	0.28792	6.51236	0.679964
JMC1364	19.2912	0.401728	281.222	4.99927	3.8588		JMC1254	22.238	3.70024	0.508984	0.169604	275.803	10.6498	3.20302	0.12295	6.98598	1.3387
JMC1364	19.3276	0.402062	281.067	5.00052	3.86513		JMC1327	23.0415	5.16326	0.48974	0.151249	272.026	12.8922	3.44842	0.471474	6.64037	1.0828
JMC1364	19.4449	10.3868	356.256	11.7257	1.65831		JMC1273	29.5535	3.27857	0.823112	0.258623	277.082	12.328	3.57618	0.204448	8.33113	1.28074
JMC1364	19.4594	10.6836	356.23	11.7446	1.65688		JMC1357	25.185	6.9954	0.658628	0.328859	269.74	22.8147	3.64738	0.35226	7.06757	2.2306
JMC1364	19.5324	10.8376	356.161	11.7531	1.66189		JMC1345	23.2125	5.34741	0.575654	0.273216	275.631	13.4968	3.51266	0.144834	6.67459	1.74119
JMC1364	19.6696	10.9963	356.008	11.765	1.67188		JMC1270	24.7931	5.10324	0.540334	0.185587	269.353	13.3931	4.20684	0.485284	5.93064	1.18229
JMC1364	19.7575	11.1382	355.988	11.7751	1.6779		JMC1337	21.6417	6.10714	0.41272	0.174974	260.877	16.7805	4.35775	0.362732	4.99383	1.36422
JMC1336	22.0424	1.09231	321.577	8.23633	2.67624		JMC1245	26.963	2.85803	0.561503	0.125321	266.146	7.07062	4.28698	0.125545	6.29409	0.693445
JMC1336	22.0797	1.09393	321.484	8.23634	2.68077		JMC1208	21.6569	4.57045	0.436766	0.166959	266.822	11.2637	3.82857	0.0915164	5.68693	1.31108
JMC1336	22.1768	1.09367	321.219	8.23398	2.69333		JMC1348	23.3612	3.97042	0.483447	0.144739	268.988	6.56717	3.73913	0.0394825	6.25624	1.10122
JMC1336	22.2652	1.09292	320.905	8.2282	2.70597		JMC1339	19.1691	1.60462	0.393246	0.0916349	275.13	11.3831	3.28152	0.242427	5.90678	0.891415
JMC1336	22.3415	1.0905	320.695	8.21907	2.71826		JMC1288	26.0137	4.05533	0.690336	0.208403	282.86	6.08843	3.88013	0.0103715	6.70638	1.0563
JMC1336	15.1287	0.437965	308.914	5.5955	2.70374		JMC1306	23.2425	3.26643	0.620981	0.180661	288.191	6.95258	3.66538	0.0977257	6.36271	1.01182
JMC1336	15.0269	0.437147	309.271	5.58543	2.69038		JMC1264	27.762	5.35285	0.817069	0.266792	286.348	2.8808	3.91417	0.120877	7.07533	1.27154
JMC1336	15.0152	0.437974	309.402	5.57981	2.69099		JMC1325	27.9657	4.16746	0.716499	0.175365	279.313	3.74513	3.9962	0.198498	6.98226	0.881494
JMC1336	15.0716	0.437284	309.03	5.57604	2.70293		JMC1297	23.8727	5.22801	0.689248	0.302697	284.656	14.7188	3.62025	0.207322	6.6921	1.75893
JMC1336	15.1782	0.436097	308.351	5.56786	2.72603		JMC1313	25.8771	4.29858	0.863781	0.253759	296.528	10.1675	3.48021	0.336395	7.43068	0.891219
JMC1336	18.9731	0.925669	325.625	7.92495	2.3941		JMC1336	18.7668	2.90459	0.818429	0.278029	318.532	6.97069	2.59984	0.140609	7.24571	1.18378
JMC1336	18.9921	0.926341	325.594	7.92889	2.3953		JMC1364	22.9646	4.98465	4.08019	4.76687	310.67	32.6052	3.17997	1.07296	8.07671	2.78785
JMC1336	19.0776	0.926276	325.296	7.9322	2.40509
JMC1336	19.0584	0.923977	325.322	7.92143	2.40593
JMC1336	19.0744	0.924381	325.295	7.9196	2.40851
JMC1313	22.8433	0.551271	285.379	6.27757	3.63887
JMC1313	22.8485	0.551027	285.334	6.27085	3.6436
JMC1313	22.7914	0.550927	285.57	6.26745	3.63648
JMC1313	22.7335	0.550442	285.752	6.26143	3.63072
JMC1313	22.7596	0.550009	285.589	6.25607	3.638
JMC1313	22.7663	0.863331	310.214	7.57553	3.00524
JMC1313	22.8608	0.866238	309.981	7.58793	3.01279
JMC1313	22.8804	0.867068	309.964	7.59359	3.01312
JMC1313	22.8978	0.871545	310.128	7.60582	3.01056
JMC1313	22.9982	0.874127	309.931	7.60938	3.02235
JMC1313	31.8518	1.16051	293.899	8.39999	3.79188
JMC1313	32.0124	1.16701	293.682	8.41796	3.80287
JMC1313	32.0014	1.1731	293.961	8.43179	3.79533
JMC1313	31.9678	1.17881	294.212	8.44971	3.7833
JMC1313	31.9439	1.18129	294.332	8.45511	3.77806
JMC1297	26.8865	0.797069	291.549	7.44755	3.61011
JMC1297	26.954	0.810209	292.198	7.49108	3.59814
JMC1297	27.0208	0.826738	293.018	7.54848	3.57964
JMC1297	27.1059	0.83362	293.167	7.58015	3.57591
JMC1297	27.1376	0.835788	293.217	7.59185	3.57457
JMC1297	16.4811	0.270542	264.078	4.24511	3.88239
JMC1297	16.403	0.270836	264.749	4.24449	3.86454
JMC1297	16.4948	0.270997	264.161	4.24699	3.88388
JMC1297	16.5859	0.270951	263.472	4.24352	3.90852
JMC1297	16.5638	0.27108	263.678	4.24419	3.9027
JMC1297	28.0096	0.96913	297.198	8.27594	3.38446
JMC1297	28.118	0.974126	297.159	8.29319	3.3905
JMC1297	28.1478	0.975486	297.126	8.29907	3.39169
JMC1297	28.0942	0.980416	297.504	8.3141	3.37911
JMC1297	28.0873	0.981736	297.569	8.31586	3.37756
JMC1325	29.8827	0.854619	284.628	7.76547	3.84815
JMC1325	29.9286	0.855256	284.526	7.76432	3.85463
JMC1325	29.9094	0.853863	284.428	7.75449	3.85704
JMC1325	29.8868	0.854445	284.519	7.75147	3.85563
JMC1325	29.8862	0.855454	284.553	7.74859	3.85698
JMC1325	22.0864	0.469476	277.84	5.75267	3.83933
JMC1325	22.199	0.469568	277.384	5.75234	3.85912
JMC1325	22.2188	0.469303	277.306	5.75185	3.86289
JMC1325	22.1888	0.469044	277.366	5.74939	3.85932
JMC1325	22.1966	0.468328	277.17	5.74035	3.86676
JMC1325	31.6819	0.813946	275.581	7.39789	4.28256
JMC1325	31.8053	0.821306	275.73	7.42435	4.28391
JMC1325	31.9166	0.825457	275.67	7.43907	4.2904
JMC1325	31.8526	0.832156	276.38	7.4647	4.26709
JMC1325	31.846	0.835262	276.61	7.47698	4.25921
JMC1264	30.8803	0.995585	289.663	8.04241	3.83969
JMC1264	30.9802	1.00538	289.725	8.07876	3.83477
JMC1264	31.0037	1.01282	289.959	8.10296	3.82622
JMC1264	31.0888	1.02055	290.11	8.12543	3.82612
JMC1264	31.1728	1.02368	290.047	8.13586	3.83153
JMC1264	20.166	0.44009	283.179	5.28801	3.81354
JMC1264	20.2247	0.439942	282.863	5.28518	3.82667
JMC1264	20.2066	0.441372	283.198	5.29036	3.81952
JMC1264	20.2377	0.440641	282.862	5.28211	3.83137
JMC1264	20.2429	0.43773	282.303	5.27064	3.84069
JMC1264	31.9796	0.990566	286.028	7.81624	4.09143
JMC1264	32.1027	0.996305	285.952	7.83605	4.0968
JMC1264	32.139	1.00001	286.031	7.84636	4.09604
JMC1264	32.047	1.00405	286.484	7.85929	4.0776
JMC1264	31.9583	1.00732	286.809	7.87034	4.06061
JMC1306	18.5833	0.378664	280.269	4.95696	3.74894
JMC1306	18.5857	0.378931	280.321	4.95723	3.74921
JMC1306	18.6303	0.379167	280.158	4.95912	3.75678
JMC1306	18.6738	0.378068	279.686	4.95176	3.77115
JMC1306	18.6673	0.377098	279.484	4.94645	3.77387
JMC1306	25.6359	0.80792	297.043	7.26957	3.52647
JMC1306	25.6882	0.810658	297.068	7.27985	3.52867
JMC1306	25.7781	0.812038	296.835	7.28748	3.53732
JMC1306	25.7698	0.813161	296.911	7.29269	3.53365
JMC1306	25.7675	0.814582	297.028	7.29918	3.53019
JMC1306	25.3272	0.672605	287.704	6.84541	3.69988
JMC1306	25.3323	0.672114	287.666	6.84395	3.70141
JMC1306	25.3734	0.672739	287.586	6.84817	3.70514
JMC1306	25.382	0.673364	287.626	6.85163	3.70451
JMC1306	25.4422	0.673602	287.481	6.85125	3.71351
JMC1288	20.2491	0.392736	273.363	5.19846	3.89521
JMC1288	20.3211	0.395479	273.587	5.21405	3.89737
JMC1288	20.3479	0.39953	274.345	5.22851	3.89172
JMC1288	20.3835	0.402804	274.83	5.23774	3.89166
JMC1288	20.3696	0.404545	275.253	5.24786	3.8815
JMC1288	29.5151	0.865166	286.802	7.58617	3.89065
JMC1288	29.5079	0.870193	287.18	7.60283	3.88117
JMC1288	29.5227	0.874358	287.359	7.61375	3.87756
JMC1288	29.5611	0.880013	287.61	7.63167	3.87348
JMC1288	29.5995	0.881581	287.585	7.6379	3.87534
JMC1288	28.0723	0.793094	286.966	7.25832	3.86761
JMC1288	28.1482	0.795052	286.856	7.27078	3.87141
JMC1288	28.1969	0.798028	286.933	7.28103	3.87265
JMC1288	28.2005	0.799785	287.045	7.28652	3.87023
JMC1288	28.2104	0.802674	287.189	7.30007	3.8644
JMC1339	21.0447	0.484953	283.799	6.7984	3.09554
JMC1339	20.9512	0.49034	284.976	6.843	3.06169
JMC1339	20.9071	0.494325	285.728	6.87788	3.03976
JMC1339	20.9151	0.49615	285.92	6.89336	3.0341
JMC1339	20.9117	0.496975	286.024	6.90375	3.02903
JMC1339	19.5667	0.413621	280.115	6.12263	3.1958
JMC1339	19.5122	0.414878	280.628	6.13025	3.18294
JMC1339	19.5312	0.416266	280.809	6.14397	3.17892
JMC1339	19.467	0.416678	281.229	6.14893	3.16592
JMC1339	19.4312	0.416689	281.412	6.14992	3.15959
JMC1339	17.0447	0.27338	260.071	4.72454	3.6077
JMC1339	17.1271	0.272215	259.007	4.71893	3.62944
JMC1339	17.0772	0.270892	258.852	4.71641	3.62081
JMC1339	17.0162	0.27056	259.194	4.7142	3.60956
JMC1339	17.0328	0.270769	259.178	4.71556	3.61205
JMC1348	27.6895	0.645162	274.502	7.41863	3.73243
JMC1348	27.6855	0.644828	274.513	7.41654	3.73294
JMC1348	27.6551	0.644722	274.611	7.41019	3.73203
JMC1348	27.6934	0.644499	274.42	7.40645	3.73909
JMC1348	27.6089	0.643343	274.645	7.39939	3.73124
JMC1348	17.9988	0.292975	260.203	4.76471	3.77752
JMC1348	18.0692	0.293311	259.829	4.77107	3.78724
JMC1348	18.152	0.293792	259.409	4.77465	3.80175
JMC1348	18.1459	0.293715	259.434	4.77567	3.79964
JMC1348	18.0707	0.293883	259.983	4.78252	3.77848
JMC1348	24.3143	0.508991	272.258	6.55748	3.70787
JMC1348	24.3279	0.509686	272.287	6.56435	3.70607
JMC1348	24.2952	0.512545	272.829	6.58651	3.68863
JMC1348	24.3343	0.514326	272.929	6.6023	3.68573
JMC1348	24.3779	0.51593	272.964	6.61316	3.68628
JMC1208	23.1431	0.44992	268.374	6.04843	3.8263
JMC1208	23.1764	0.455524	269.185	6.09298	3.80379
JMC1208	23.241	0.459087	269.477	6.12082	3.79705
JMC1208	23.3215	0.462964	269.783	6.15244	3.79061
JMC1208	23.3442	0.465414	270.132	6.17195	3.7823
JMC1208	15.3939	0.218469	250.358	3.85874	3.98938
JMC1208	15.4737	0.221539	251.206	3.89979	3.96783
JMC1208	15.4698	0.222964	251.949	3.91978	3.9466
JMC1208	15.4344	0.224317	252.903	3.934	3.92335
JMC1208	15.4142	0.225255	253.492	3.9439	3.90836
JMC1208	26.2097	0.608188	277.043	6.9081	3.79405
JMC1208	26.2369	0.622122	278.508	6.99287	3.75195
JMC1208	26.2869	0.631207	279.353	7.04538	3.73109
JMC1208	26.3551	0.638331	279.879	7.08597	3.71933
JMC1208	26.3526	0.646194	280.686	7.12879	3.69665
JMC1245	28.4226	0.526859	256.517	6.21237	4.57516
JMC1245	28.3146	0.54382	259.336	6.3406	4.4656
JMC1245	28.4277	0.556503	260.708	6.43659	4.41658
JMC1245	28.6483	0.573011	262.075	6.55128	4.37293
JMC1245	28.6951	0.575398	262.192	6.57068	4.36715
JMC1245	22.8801	0.404549	261.158	5.33326	4.29008
JMC1245	22.8886	0.410737	262.427	5.37942	4.25484
JMC1245	22.893	0.413483	262.991	5.40204	4.23784
JMC1245	23.0181	0.415916	262.874	5.42417	4.24361
JMC1245	23.118	0.418578	262.922	5.44452	4.2461
JMC1245	29.3328	0.684829	273.255	6.91363	4.24275
JMC1245	29.3926	0.702491	274.724	7.00051	4.19864
JMC1245	29.4011	0.719199	276.199	7.07729	4.15429
JMC1245	29.4635	0.730019	276.851	7.1266	4.1343
JMC1245	29.5484	0.747153	277.957	7.19841	4.10485
JMC1337	14.3659	0.181129	238.761	3.116	4.61037
JMC1337	14.3276	0.181355	239.239	3.12026	4.59181
JMC1337	14.3519	0.181188	238.773	3.12239	4.59644
JMC1337	14.3532	0.181356	238.847	3.12594	4.59164
JMC1337	14.3566	0.182133	239.31	3.13737	4.576
JMC1337	28.929	0.574431	261.867	6.15888	4.69713
JMC1337	29.1704	0.591279	263.136	6.26144	4.65873
JMC1337	29.2954	0.599249	263.66	6.30863	4.6437
JMC1337	29.4653	0.616144	265.104	6.40527	4.60016
JMC1337	29.5989	0.631751	266.413	6.49312	4.5585
JMC1337	21.0436	0.432723	277.297	5.35975	3.92623
JMC1337	21.0999	0.443876	278.893	5.44973	3.87174
JMC1337	21.381	0.458302	279.833	5.5688	3.83943
JMC1337	21.4212	0.463604	280.472	5.60741	3.82015
JMC1337	21.4653	0.472273	281.554	5.67241	3.78415
JMC1270	30.2209	0.621344	263.084	6.14707	4.9163
JMC1270	30.5383	0.655613	265.827	6.33822	4.81812
JMC1270	30.6979	0.67569	267.428	6.45066	4.75888
JMC1270	30.9333	0.6943	268.522	6.55166	4.72145
JMC1270	31.0429	0.704023	269.126	6.60327	4.70114
JMC1270	18.1759	0.278892	254.932	4.2955	4.23139
JMC1270	18.2541	0.278843	254.348	4.29953	4.24561
JMC1270	18.2871	0.279141	254.2	4.31092	4.24205
JMC1270	18.2522	0.279026	254.415	4.31262	4.23226
JMC1270	18.2559	0.27905	254.364	4.31458	4.2312
JMC1270	25.5268	0.66798	286.266	7.04812	3.62178
JMC1270	25.5054	0.67176	286.63	7.06515	3.61003
JMC1270	25.4185	0.672112	286.933	7.06951	3.59551
JMC1270	25.3871	0.672934	287.089	7.07307	3.58926
JMC1270	25.3994	0.6743	287.123	7.07972	3.58763
JMC1345	23.5863	0.548142	280.555	6.93824	3.39946
JMC1345	23.6967	0.550064	280.304	6.94901	3.41008
JMC1345	23.7641	0.55203	280.299	6.95686	3.41593
JMC1345	23.8469	0.553557	280.134	6.96376	3.42443
JMC1345	23.8514	0.555181	280.333	6.97429	3.4199
JMC1345	16.4471	0.253125	256.839	4.40541	3.73339
JMC1345	16.3925	0.25331	257.287	4.41307	3.71453
JMC1345	16.3989	0.253542	257.32	4.41688	3.71278
JMC1345	16.3812	0.253613	257.481	4.41822	3.70764
JMC1345	16.4403	0.254444	257.391	4.42238	3.71753
JMC1345	29.5208	0.921486	289.168	8.6551	3.4108
JMC1345	29.5132	0.920732	289.145	8.6517	3.41127
JMC1345	29.4731	0.921881	289.312	8.65366	3.40586
JMC1345	29.4173	0.921867	289.515	8.65031	3.40072
JMC1345	29.458	0.921832	289.39	8.65002	3.40554
JMC1357	32.6351	0.962573	281.307	8.7323	3.73729
JMC1357	32.6074	0.969414	281.756	8.76422	3.72052
JMC1357	32.6246	0.971429	281.816	8.77239	3.71901
JMC1357	32.6284	0.976388	282.036	8.78927	3.7123
JMC1357	32.6109	0.978196	282.198	8.79598	3.70747
JMC1357	15.84	0.204215	237.457	3.92304	4.03768
JMC1357	15.8501	0.20411	237.31	3.91897	4.04445
JMC1357	15.8225	0.203739	237.39	3.9125	4.04409
JMC1357	15.7848	0.204595	238.326	3.91414	4.03277
JMC1357	15.7861	0.204854	238.484	3.91504	4.03216
JMC1357	26.9766	0.787603	289.3	8.44847	3.19308
JMC1357	27.0584	0.79379	289.423	8.48385	3.1894
JMC1357	27.1094	0.800871	289.672	8.52044	3.18168
JMC1357	27.1946	0.807032	289.786	8.55304	3.17952
JMC1357	27.2465	0.810609	289.838	8.56985	3.17935
JMC1273	25.0796	0.457904	259.394	6.50781	3.85377
JMC1273	25.1381	0.459649	259.464	6.51806	3.85668
JMC1273	25.1377	0.460756	259.684	6.52424	3.85297
JMC1273	25.0977	0.46196	260.068	6.534	3.84109
JMC1273	25.0915	0.462364	260.169	6.5374	3.83814
JMC1273	32.7749	1.03989	284.158	9.32144	3.51608
JMC1273	32.9242	1.04096	283.783	9.32835	3.52948
JMC1273	32.9089	1.0458	284.124	9.3417	3.5228
JMC1273	32.9577	1.04885	284.157	9.35196	3.52415
JMC1273	33.0219	1.05286	284.206	9.36515	3.52604
JMC1273	30.6161	0.955613	287.136	9.08642	3.36944
JMC1273	30.5776	0.960108	287.424	9.11223	3.35567
JMC1273	30.6463	0.964766	287.442	9.1358	3.35452
JMC1273	30.6466	0.966626	287.521	9.14559	3.35097
JMC1273	30.6835	0.968559	287.498	9.15677	3.35091
JMC1327	26.9909	0.466102	251.235	6.4676	4.17325
JMC1327	27.182	0.480673	252.998	6.59731	4.12016
JMC1327	27.2456	0.487427	253.878	6.655	4.09401
JMC1327	27.3357	0.50132	255.826	6.77138	4.03695
JMC1327	27.4317	0.50836	256.581	6.82876	4.01708
JMC1327	26.1045	0.667614	282.848	7.90312	3.30306
JMC1327	26.0917	0.671254	283.228	7.92685	3.29156
JMC1327	26.0971	0.674348	283.481	7.94724	3.28379
JMC1327	26.1342	0.680698	283.913	7.98528	3.2728
JMC1327	26.1625	0.681631	283.883	7.99225	3.27348
JMC1327	15.7369	0.301011	277.455	5.24231	3.00191
JMC1327	15.7714	0.30348	277.946	5.28294	2.98535
JMC1327	15.7965	0.306137	278.576	5.319	2.96983
JMC1327	15.7993	0.307324	278.895	5.33361	2.96221
JMC1327	15.7421	0.308719	279.653	5.3529	2.94085
JMC1254	22.8249	0.539347	282.5	7.37667	3.0942
JMC1254	22.7681	0.541518	282.976	7.39205	3.08008
JMC1254	22.7969	0.543417	283.081	7.40703	3.07774
JMC1254	22.7971	0.545214	283.326	7.41681	3.0737
JMC1254	22.8381	0.546129	283.246	7.42578	3.07552
JMC1254	26.5486	0.688695	282.536	8.32565	3.18878
JMC1254	26.475	0.694179	283.286	8.35859	3.1674
JMC1254	26.4597	0.698521	283.713	8.38341	3.15619
JMC1254	26.4301	0.70101	284.029	8.39568	3.14807
JMC1254	26.3811	0.704957	284.503	8.41698	3.13428
JMC1254	17.3441	0.285219	261.215	5.15356	3.36546
JMC1254	17.3375	0.286452	261.639	5.16832	3.35457
JMC1254	17.4555	0.287861	261.275	5.18219	3.36836
JMC1254	17.5329	0.286052	260.005	5.19251	3.37657
JMC1254	17.5803	0.286186	259.719	5.1945	3.3844
JMC1350	27.085	0.520526	260.605	6.75392	4.01026
JMC1350	27.0767	0.523038	261.047	6.77581	3.99608
JMC1350	27.0601	0.525926	261.559	6.79598	3.98178
JMC1350	27.0771	0.530785	262.231	6.83482	3.96164
JMC1350	27.0678	0.534165	262.791	6.86248	3.94431
JMC1350	24.4843	0.562807	278.46	7.07635	3.46002
JMC1350	24.4624	0.568524	279.256	7.11788	3.43675
JMC1350	24.3912	0.574491	280.246	7.16225	3.40552
JMC1350	24.4962	0.58008	280.445	7.1997	3.40239
JMC1350	24.5001	0.583758	280.879	7.22409	3.39145
JMC1350	22.4633	0.368077	254.03	5.45225	4.12001
JMC1350	22.5916	0.375797	255.293	5.52438	4.08943
JMC1350	22.7332	0.382807	256.234	5.58836	4.06795
JMC1350	22.7701	0.386514	256.918	5.62187	4.05028
JMC1350	22.7613	0.394605	258.893	5.6952	3.99658
JMC1240	21.7108	0.615874	296.302	7.29176	2.97744
JMC1240	21.8577	0.618837	296.031	7.3102	2.99003
JMC1240	21.8917	0.620217	296.056	7.31817	2.99142
JMC1240	21.9997	0.620366	295.689	7.32034	3.00528
JMC1240	22.0642	0.620149	295.438	7.31816	3.015
JMC1240	28.4495	0.54355	258.353	6.63764	4.28609
JMC1240	28.4499	0.548516	259.104	6.67004	4.26533
JMC1240	28.4895	0.551045	259.334	6.68566	4.26129
JMC1240	28.5469	0.5533	259.423	6.70128	4.25991
JMC1240	28.6047	0.559153	260.069	6.73454	4.24747
JMC1240	16.2577	0.211356	238.383	3.85912	4.2128
JMC1240	16.3308	0.212387	238.238	3.87853	4.21056
JMC1240	16.3096	0.21337	238.988	3.89676	4.18542
JMC1240	16.3634	0.214513	239.162	3.9152	4.17946
JMC1240	16.451	0.215452	238.924	3.93352	4.18226
JMC1304	21.9669	0.756771	306.36	7.70263	2.85188
JMC1304	21.9266	0.760342	306.709	7.72071	2.83998
JMC1304	21.9879	0.76602	306.81	7.74706	2.83823
JMC1304	22.1141	0.769561	306.553	7.76312	2.84861
JMC1304	22.1499	0.770933	306.504	7.77006	2.85067
JMC1304	24.5856	0.489158	267.837	6.28088	3.91435
JMC1304	24.695	0.493566	268.081	6.31424	3.91099
JMC1304	24.7771	0.495687	268.04	6.33062	3.91385
JMC1304	24.8159	0.496865	268.049	6.33993	3.91422
JMC1304	24.8369	0.498657	268.175	6.35759	3.90665
JMC1304	29.615	0.732881	275.816	7.42754	3.98719
JMC1304	29.658	0.749044	277.051	7.51649	3.94572
JMC1304	29.8673	0.764093	277.589	7.60965	3.92493
JMC1304	29.9349	0.772106	278.014	7.65947	3.90822
JMC1304	30.0513	0.787678	278.854	7.75961	3.87278
JMC1255	24.4286	0.784471	298.984	7.86629	3.10548
JMC1255	24.498	0.792455	299.269	7.90866	3.09762
JMC1255	24.472	0.79559	299.558	7.92231	3.08899
JMC1255	24.5072	0.803259	299.913	7.95822	3.07949
JMC1255	24.5033	0.806305	300.113	7.97235	3.07353
JMC1255	18.1416	0.325548	269.174	5.05815	3.58661
JMC1255	18.2194	0.325918	268.767	5.06357	3.59813
JMC1255	18.1988	0.326363	269.003	5.06766	3.59115
JMC1255	18.1813	0.326713	269.166	5.07532	3.5823
JMC1255	18.1574	0.326616	269.302	5.07765	3.57595
JMC1255	26.714	0.604199	274.391	6.90856	3.86679
JMC1255	26.8234	0.615932	275.304	6.98151	3.84207
JMC1255	26.9928	0.626893	275.856	7.04837	3.82965
JMC1255	27.0109	0.632176	276.36	7.07953	3.81535
JMC1255	27.0856	0.643627	277.25	7.14868	3.7889
RRRS0002	24.2532	0.436375	260.454	5.85095	4.14517
RRRS0002	24.2668	0.439518	261.039	5.87178	4.13278
RRRS0002	24.2419	0.445321	262.314	5.90925	4.10237
RRRS0002	24.1992	0.447596	262.936	5.92626	4.08339
RRRS0002	24.1346	0.449306	263.553	5.93594	4.06583
RRRS0002	29.3626	0.615087	265.136	6.7574	4.34526
RRRS0002	29.7326	0.63798	266.376	6.89349	4.31314
RRRS0002	29.893	0.64822	266.937	6.95221	4.29978
RRRS0002	30.1358	0.668762	268.216	7.06732	4.2641
RRRS0002	30.2587	0.679118	268.832	7.12337	4.2478
RRRS0002	28.5407	0.789489	284.621	7.64757	3.732
RRRS0002	28.511	0.798186	285.364	7.68635	3.70931
RRRS0002	28.5129	0.803808	285.773	7.70896	3.69867
RRRS0002	28.5962	0.807607	285.753	7.72476	3.70189
RRRS0002	28.6064	0.811923	286.008	7.74143	3.69524
JMC1280	22.2776	0.570963	290.028	6.80653	3.27297
JMC1280	22.4756	0.579049	290.114	6.84954	3.28133
JMC1280	22.4859	0.585355	290.742	6.88158	3.26755
JMC1280	22.5719	0.597834	291.674	6.94606	3.2496
JMC1280	22.6119	0.605023	292.228	6.98122	3.23896
JMC1280	31.3473	0.775141	272.97	7.63069	4.10806
JMC1280	31.7059	0.808787	274.41	7.79824	4.06578
JMC1280	31.8568	0.834547	275.904	7.91881	4.02293
JMC1280	32.2236	0.871813	277.515	8.0868	3.98472
JMC1280	32.1963	0.910591	280.058	8.24765	3.90369
JMC1280	21.3745	0.497141	284.279	6.60864	3.23433
JMC1280	21.444	0.499528	284.254	6.6275	3.23561
JMC1280	21.6246	0.498768	283.299	6.62809	3.26257
JMC1280	21.669	0.498315	283.03	6.62909	3.26878
JMC1280	21.6978	0.498774	282.997	6.63482	3.27029
JMC1271	18.4392	0.316248	264.127	5.17147	3.56556
JMC1271	18.3934	0.317826	264.832	5.18907	3.54465
JMC1271	18.4364	0.318288	264.682	5.19523	3.54872
JMC1271	18.3824	0.318743	265.122	5.20201	3.5337
JMC1271	18.3185	0.318632	265.482	5.20628	3.51853
JMC1271	28.1007	0.677032	276.072	7.51077	3.74139
JMC1271	28.2149	0.695861	277.406	7.62388	3.70086
JMC1271	28.2777	0.714091	278.764	7.7311	3.65766
JMC1271	28.3578	0.728583	279.704	7.81914	3.62672
JMC1271	28.4232	0.735791	280.089	7.86371	3.61447
JMC1271	23.6775	0.632499	289.496	7.43441	3.18485
JMC1271	23.8415	0.643588	289.772	7.50466	3.17689
JMC1271	23.8983	0.646674	289.818	7.5245	3.17607
JMC1271	23.9436	0.650454	290.006	7.54786	3.17223
JMC1271	24.0836	0.657481	290.144	7.58748	3.17412
RRRS0001	32.0832	0.733815	266.181	7.7883	4.11941
RRRS0001	32.141	0.746728	267.14	7.85749	4.0905
RRRS0001	32.1535	0.759025	268.24	7.92153	4.05901
RRRS0001	32.2168	0.76547	268.569	7.95359	4.0506
RRRS0001	32.1821	0.772162	269.261	7.98508	4.03027
RRRS0001	17.5041	0.227395	236.269	4.02762	4.34602
RRRS0001	17.5012	0.231052	238.16	4.07183	4.29813
RRRS0001	17.5036	0.234192	239.697	4.11231	4.25639
RRRS0001	17.4701	0.235394	240.568	4.13013	4.22992
RRRS0001	17.4825	0.236798	241.148	4.14955	4.21312
RRRS0001	19.872	0.397262	275.708	5.7435	3.45991
RRRS0001	20.0704	0.407801	276.734	5.84027	3.43655
RRRS0001	20.271	0.413486	276.774	5.89117	3.44091
RRRS0001	20.3058	0.415884	277.035	5.91085	3.43534
RRRS0001	20.361	0.417008	276.944	5.92179	3.43832

## Sheet: Damage
DDE	Accession	Plot	Insect total damage		Row label	Mean damage 30 DAE	SD Damage 30 DAE		Row label	Mean damage 45 DAE	SD Damage 45 DAE		Etiquetas de fila	Mean damage 60 DAE	SD Damage 60 DAE
60	RRRS0001	Left	5		Izam	27.8667	20.6393		Izam	40.6222	14.0485		Izam	15.4111	10.2004
60	RRRS0001	Left	18.3333		JMC1208	10.4267	10.1436		JMC1208	18	10.4626		JMC1208	14.3778	9.78329
60	RRRS0001	Left	21.6667		JMC1240	14.3333	13.8404		JMC1240	13.2444	8.43491		JMC1240	16.0889	8.28069
60	RRRS0001	Left	5		JMC1245	7.18	9.2382		JMC1245	20.5333	16.1859		JMC1245	21.7778	11.6611
60	RRRS0001	Left	5		JMC1254	18.2	9.28224		JMC1254	24.1333	17.8084		JMC1254	13.0667	7.89017
60	RRRS0001	Center	36		JMC1255	30.8667	15.4439		JMC1255	44.9111	10.4538		JMC1255	9.51111	7.09707
60	RRRS0001	Center	11.6667		JMC1264	7.86667	17.7571		JMC1264	1	0		JMC1264	12.0333	15.683
60	RRRS0001	Center	6.66667		JMC1270	5.24667	7.86968		JMC1270	27.1	11.2608		JMC1270	30.4556	10.7004
60	RRRS0001	Center	11.6667		JMC1271	35.6	20.3758		JMC1271	15	9.93833		JMC1271	13.8	11.0143
60	RRRS0001	Center	6.66667		JMC1273	18.7333	24.3953		JMC1273	76.1778	16.1107		JMC1273	13.1556	6.72185
60	RRRS0001	Right	13.3333		JMC1280	11.8667	9.56986		JMC1280	45.3778	12.1362		JMC1280	12	8.72969
60	RRRS0001	Right	11		JMC1288	4.26	2.92502		JMC1288	33.6333	10.1332		JMC1288	35.1	15.2854
60	RRRS0001	Right	15		JMC1297	1	0		JMC1297	8.51111	11.1321		JMC1297	2.75556	4.59382
60	RRRS0001	Right	33.3333		JMC1304	14.2667	11.1024		JMC1304	17.3556	9.609		JMC1304	8.84444	4.51642
60	RRRS0001	Right	30.8333		JMC1306	7.86667	17.7571		JMC1306	1	0		JMC1306	8.37778	10.6213
60	JMC1208	Left	23.3333		JMC1313	3.66667	9.97775		JMC1313	26.8778	9.81316		JMC1313	17.9778	9.27639
60	JMC1208	Left	7		JMC1325	1	0		JMC1325	7	16.5529		JMC1325	10.3333	14.1122
60	JMC1208	Left	33.8333		JMC1327	11.1444	7.45328		JMC1327	9.6	8.31282		JMC1327	33.4889	10.297
60	JMC1208	Left	9		JMC1336	1	0		JMC1336	15.9778	7.35599		JMC1336	36.8889	5.72961
60	JMC1208	Left	11.3333		JMC1337	7.18	9.2382		JMC1337	21.3333	16.3856		JMC1337	23.9778	11.1378
60	JMC1208	Center	5		JMC1339	7.66	13.2449		JMC1339	31.6333	9.11494		JMC1339	35.1	15.2854
60	JMC1208	Center	10.3333		JMC1345	10.4267	10.1436		JMC1345	20.1333	13.1599		JMC1345	15.9889	10.354
60	JMC1208	Center	15.3333		JMC1348	6.46667	4.92188		JMC1348	30.3556	17.4363		JMC1348	38.1111	13.4592
60	JMC1208	Center	13.3333		JMC1350	14.3333	13.8404		JMC1350	11.6222	8.29267		JMC1350	14.0889	6.50067
60	JMC1208	Center	31		JMC1357	14.1111	12.215		JMC1357	1.62222	1.99951		JMC1357	6.75556	8.90149
60	JMC1208	Right	29.1667		JMC1364	6.17778	9.32846		JMC1364	29	18.4672		JMC1364	31.4	9.8268
60	JMC1208	Right	10		TZI	12.4667	15.8235		TZI	20.5111	16.7747		TZI	12.3556	6.61028
60	JMC1208	Right	1
60	JMC1208	Right	9.33333
60	JMC1208	Right	6.66667
60	JMC1240	Left	8.33333
60	JMC1240	Left	11
60	JMC1240	Left	11
60	JMC1240	Left	11
60	JMC1240	Left	21.6667
60	JMC1240	Center	26
60	JMC1240	Center	13.3333
60	JMC1240	Center	11
60	JMC1240	Center	21.6667
60	JMC1240	Center	11
60	JMC1240	Right	8.33333
60	JMC1240	Right	9.33333
60	JMC1240	Right	13.3333
60	JMC1240	Right	27.6667
60	JMC1240	Right	36.6667
60	JMC1245	Left	21.6667
60	JMC1245	Left	21
60	JMC1245	Left	44.3333
60	JMC1245	Left	21
60	JMC1245	Left	13.3333
60	JMC1245	Center	16
60	JMC1245	Center	17
60	JMC1245	Center	31.3333
60	JMC1245	Center	18.3333
60	JMC1245	Center	12.3333
60	JMC1245	Right	12.3333
60	JMC1245	Right	19.6667
60	JMC1245	Right	25
60	JMC1245	Right	49.6667
60	JMC1245	Right	3.66667
60	JMC1254	Left	23.3333
60	JMC1254	Left	8.33333
60	JMC1254	Left	28.3333
60	JMC1254	Left	15
60	JMC1254	Left	3
60	JMC1254	Center	3.66667
60	JMC1254	Center	19
60	JMC1254	Center	8.33333
60	JMC1254	Center	11
60	JMC1254	Center	11
60	JMC1254	Right	20
60	JMC1254	Right	13.3333
60	JMC1254	Right	23.3333
60	JMC1254	Right	5
60	JMC1254	Right	3.33333
60	JMC1255	Left	19.3333
60	JMC1255	Left	14
60	JMC1255	Left	18.3333
60	JMC1255	Left	6.66667
60	JMC1255	Left	3.33333
60	JMC1255	Center	10
60	JMC1255	Center	3.33333
60	JMC1255	Center	6.66667
60	JMC1255	Center	25
60	JMC1255	Center	6.66667
60	JMC1255	Right	16.6667
60	JMC1255	Right	3.33333
60	JMC1255	Right	5
60	JMC1255	Right	3.33333
60	JMC1255	Right	1
60	JMC1264	Left	1
60	JMC1264	Left	25
60	JMC1264	Left	1
60	JMC1264	Left	22.3333
60	JMC1264	Left	28.6667
60	JMC1264	Center	1
60	JMC1264	Center	1
60	JMC1264	Center	1
60	JMC1264	Center	1
60	JMC1264	Center	1
60	JMC1264	Right	1
60	JMC1264	Right	18.6667
60	JMC1264	Right	21
60	JMC1264	Right	1
60	JMC1264	Right	55.8333
60	JMC1270	Left	35
60	JMC1270	Left	45
60	JMC1270	Left	29.1667
60	JMC1270	Left	46.6667
60	JMC1270	Left	21.6667
60	JMC1270	Center	28.3333
60	JMC1270	Center	18.3333
60	JMC1270	Center	31.6667
60	JMC1270	Center	18.3333
60	JMC1270	Center	35
60	JMC1270	Right	51.6667
60	JMC1270	Right	28.3333
60	JMC1270	Right	29.3333
60	JMC1270	Right	26.6667
60	JMC1270	Right	11.6667
60	JMC1271	Left	15
60	JMC1271	Left	5.33333
60	JMC1271	Left	6.66667
60	JMC1271	Left	6.66667
60	JMC1271	Left	45
60	JMC1271	Center	7.33333
60	JMC1271	Center	5
60	JMC1271	Center	6.66667
60	JMC1271	Center	6.66667
60	JMC1271	Center	11
60	JMC1271	Right	30
60	JMC1271	Right	26.6667
60	JMC1271	Right	11
60	JMC1271	Right	11.6667
60	JMC1271	Right	12.3333
60	JMC1273	Left	8.33333
60	JMC1273	Left	11
60	JMC1273	Left	11.6667
60	JMC1273	Left	11
60	JMC1273	Left	6.66667
60	JMC1273	Center	23.3333
60	JMC1273	Center	11
60	JMC1273	Center	21.6667
60	JMC1273	Center	12.3333
60	JMC1273	Center	8.33333
60	JMC1273	Right	11
60	JMC1273	Right	6.66667
60	JMC1273	Right	11
60	JMC1273	Right	11.6667
60	JMC1273	Right	31.6667
60	JMC1280	Left	3.33333
60	JMC1280	Left	5
60	JMC1280	Left	6.66667
60	JMC1280	Left	11.6667
60	JMC1280	Left	8.33333
60	JMC1280	Center	6.66667
60	JMC1280	Center	15
60	JMC1280	Center	5
60	JMC1280	Center	8.33333
60	JMC1280	Center	21.6667
60	JMC1280	Right	18.3333
60	JMC1280	Right	11.6667
60	JMC1280	Right	8.33333
60	JMC1280	Right	11
60	JMC1280	Right	39
60	JMC1288	Left	40
60	JMC1288	Left	21
60	JMC1288	Left	61.6667
60	JMC1288	Left	11
60	JMC1288	Left	46.6667
60	JMC1288	Center	40.6667
60	JMC1288	Center	47.6667
60	JMC1288	Center	53.3333
60	JMC1288	Center	36.6667
60	JMC1288	Center	41
60	JMC1288	Right	35
60	JMC1288	Right	36
60	JMC1288	Right	30.6667
60	JMC1288	Right	24.1667
60	JMC1288	Right	1
60	JMC1297	Left	1
60	JMC1297	Left	1
60	JMC1297	Left	17
60	JMC1297	Left	1
60	JMC1297	Left	1
60	JMC1297	Center	11.3333
60	JMC1297	Center	1
60	JMC1297	Center	1
60	JMC1297	Center	1
60	JMC1297	Center	1
60	JMC1297	Right	1
60	JMC1297	Right	1
60	JMC1297	Right	1
60	JMC1297	Right	1
60	JMC1297	Right	1
60	JMC1304	Left	11.6667
60	JMC1304	Left	6.66667
60	JMC1304	Left	5
60	JMC1304	Left	5
60	JMC1304	Left	16.6667
60	JMC1304	Center	5
60	JMC1304	Center	6.66667
60	JMC1304	Center	5
60	JMC1304	Center	3.33333
60	JMC1304	Center	18.3333
60	JMC1304	Right	8.33333
60	JMC1304	Right	8.33333
60	JMC1304	Right	6.66667
60	JMC1304	Right	15
60	JMC1304	Right	11
60	JMC1306	Left	1
60	JMC1306	Left	1
60	JMC1306	Left	25
60	JMC1306	Left	1
60	JMC1306	Left	22.3333
60	JMC1306	Center	28.6667
60	JMC1306	Center	1
60	JMC1306	Center	1
60	JMC1306	Center	1
60	JMC1306	Center	1
60	JMC1306	Right	1
60	JMC1306	Right	1
60	JMC1306	Right	18.6667
60	JMC1306	Right	21
60	JMC1306	Right	1
60	JMC1313	Left	21.3333
60	JMC1313	Left	38.6667
60	JMC1313	Left	18.6667
60	JMC1313	Left	24.6667
60	JMC1313	Left	15.3333
60	JMC1313	Center	15.3333
60	JMC1313	Center	7.33333
60	JMC1313	Center	14
60	JMC1313	Center	15.6667
60	JMC1313	Center	29
60	JMC1313	Right	30
60	JMC1313	Right	17
60	JMC1313	Right	11.3333
60	JMC1313	Right	10.3333
60	JMC1313	Right	1
60	JMC1325	Left	1
60	JMC1325	Left	1
60	JMC1325	Left	1
60	JMC1325	Left	1
60	JMC1325	Left	11.6667
60	JMC1325	Center	12.6667
60	JMC1325	Center	11
60	JMC1325	Center	1
60	JMC1325	Center	54
60	JMC1325	Center	1
60	JMC1325	Right	1
60	JMC1325	Right	1
60	JMC1325	Right	27.6667
60	JMC1325	Right	19
60	JMC1325	Right	11
60	JMC1327	Left	54.3333
60	JMC1327	Left	39
60	JMC1327	Left	32.6667
60	JMC1327	Left	36.3333
60	JMC1327	Left	46
60	JMC1327	Center	26.6667
60	JMC1327	Center	24.3333
60	JMC1327	Center	26
60	JMC1327	Center	11.6667
60	JMC1327	Center	29.3333
60	JMC1327	Right	24.3333
60	JMC1327	Right	30.3333
60	JMC1327	Right	37.3333
60	JMC1327	Right	45.6667
60	JMC1327	Right	38.3333
60	JMC1336	Left	31.3333
60	JMC1336	Left	30.1667
60	JMC1336	Left	36.3333
60	JMC1336	Left	42.3333
60	JMC1336	Left	29.8333
60	JMC1336	Center	29.3333
60	JMC1336	Center	40
60	JMC1336	Center	39.6667
60	JMC1336	Center	49.3333
60	JMC1336	Center	37.3333
60	JMC1336	Right	35.3333
60	JMC1336	Right	34.3333
60	JMC1336	Right	37.6667
60	JMC1336	Right	34
60	JMC1336	Right	46.3333
60	JMC1337	Left	36.6667
60	JMC1337	Left	21.6667
60	JMC1337	Left	21
60	JMC1337	Left	44.3333
60	JMC1337	Left	21
60	JMC1337	Center	13.3333
60	JMC1337	Center	16
60	JMC1337	Center	17
60	JMC1337	Center	31.3333
60	JMC1337	Center	18.3333
60	JMC1337	Right	12.3333
60	JMC1337	Right	12.3333
60	JMC1337	Right	19.6667
60	JMC1337	Right	25
60	JMC1337	Right	49.6667
60	JMC1339	Left	40
60	JMC1339	Left	21
60	JMC1339	Left	61.6667
60	JMC1339	Left	11
60	JMC1339	Left	46.6667
60	JMC1339	Center	40.6667
60	JMC1339	Center	47.6667
60	JMC1339	Center	53.3333
60	JMC1339	Center	36.6667
60	JMC1339	Center	41
60	JMC1339	Right	35
60	JMC1339	Right	36
60	JMC1339	Right	30.6667
60	JMC1339	Right	24.1667
60	JMC1339	Right	1
60	JMC1345	Left	30.8333
60	JMC1345	Left	23.3333
60	JMC1345	Left	7
60	JMC1345	Left	33.8333
60	JMC1345	Left	9
60	JMC1345	Center	11.3333
60	JMC1345	Center	5
60	JMC1345	Center	10.3333
60	JMC1345	Center	15.3333
60	JMC1345	Center	13.3333
60	JMC1345	Right	31
60	JMC1345	Right	29.1667
60	JMC1345	Right	10
60	JMC1345	Right	1
60	JMC1345	Right	9.33333
60	JMC1348	Left	47
60	JMC1348	Left	29
60	JMC1348	Left	24.6667
60	JMC1348	Left	43.3333
60	JMC1348	Left	28.3333
60	JMC1348	Center	31.6667
60	JMC1348	Center	12.6667
60	JMC1348	Center	42.3333
60	JMC1348	Center	33.3333
60	JMC1348	Center	48.3333
60	JMC1348	Right	49
60	JMC1348	Right	25.3333
60	JMC1348	Right	45
60	JMC1348	Right	71
60	JMC1348	Right	40.6667
60	JMC1350	Left	6.66667
60	JMC1350	Left	8.33333
60	JMC1350	Left	11
60	JMC1350	Left	11
60	JMC1350	Left	11
60	JMC1350	Center	21.6667
60	JMC1350	Center	26
60	JMC1350	Center	13.3333
60	JMC1350	Center	11
60	JMC1350	Center	21.6667
60	JMC1350	Right	11
60	JMC1350	Right	8.33333
60	JMC1350	Right	9.33333
60	JMC1350	Right	13.3333
60	JMC1350	Right	27.6667
60	JMC1357	Left	16.3333
60	JMC1357	Left	1
60	JMC1357	Left	1
60	JMC1357	Left	1
60	JMC1357	Left	1
60	JMC1357	Center	1
60	JMC1357	Center	1
60	JMC1357	Center	1
60	JMC1357	Center	1
60	JMC1357	Center	1
60	JMC1357	Right	28.6667
60	JMC1357	Right	21.6667
60	JMC1357	Right	1
60	JMC1357	Right	13
60	JMC1357	Right	11.6667
60	JMC1364	Left	29
60	JMC1364	Left	43.6667
60	JMC1364	Left	12.6667
60	JMC1364	Left	36.6667
60	JMC1364	Left	28.6667
60	JMC1364	Center	30.3333
60	JMC1364	Center	22.6667
60	JMC1364	Center	18
60	JMC1364	Center	21.6667
60	JMC1364	Center	39
60	JMC1364	Right	23
60	JMC1364	Right	39.6667
60	JMC1364	Right	40.6667
60	JMC1364	Right	45.6667
60	JMC1364	Right	39.6667
60	RRRS0002	Left	8.33333
60	RRRS0002	Left	20
60	RRRS0002	Left	6.66667
60	RRRS0002	Left	11
60	RRRS0002	Left	6.66667
60	RRRS0002	Center	18.3333
60	RRRS0002	Center	20
60	RRRS0002	Center	18.3333
60	RRRS0002	Center	8.33333
60	RRRS0002	Center	6.66667
60	RRRS0002	Right	23.3333
60	RRRS0002	Right	21
60	RRRS0002	Right	5
60	RRRS0002	Right	6.66667
60	RRRS0002	Right	5

## Sheet: Yield
Accession	Yield (g*plant)		Accession	Mean Yield (g*plant)	SD Yield
RRS001	53.34		RRS001	53.6569	0.621189
RRS001	54.4162		JMC1271	49.7683	0.935541
RRS001	53.4015		JMC1280	53.6569	0.621189
RRS001	54.4162		RRS002	49.4443	0.749653
RRS001	53.0838		JMC1255	38.5268	0.613613
RRS001	54.0575		JMC1304	33.0202	0.75325
RRS001	52.6963		JMC1240	28.1606	0.924132
RRS001	53.34		JMC1350	34.5111	0.777438
RRS001	54.4162		JMC1254	31.3606	0.924132
RRS001	53.4015		JMC1327	34.9943	0.749653
JMC1271	49.2913		JMC1273	58.8794	1.69905
JMC1271	49.2913		JMC1357	35.0003	0.748949
JMC1271	51.3761		JMC1345	32.8518	0.613613
JMC1271	49.2503		JMC1270	29.0106	0.924132
JMC1271	49.6276		JMC1337	38.4731	0.924132
JMC1271	48.6045		JMC1245	30.8096	0.849532
JMC1271	49.3066		JMC1208	57.0606	0.924132
JMC1271	51.3382		JMC1348	66.6731	0.924132
JMC1271	50.306		JMC1339	54.9856	0.924132
JMC1271	49.2913		JMC1288	55.95	2.2418
JMC1280	53.34		JMC1306	42.4318	0.749653
JMC1280	54.4162		JMC1264	51.9981	0.924132
JMC1280	53.4015		JMC1325	67.0856	0.924132
JMC1280	54.4162		JMC1297	30.8106	0.924132
JMC1280	53.0838		JMC1313	39.5106	0.924132
JMC1280	54.0575		JMC1336	42.1068	0.749653
JMC1280	52.6963		JMC1364	42.9393	0.613613
JMC1280	53.34
JMC1280	54.4162
JMC1280	53.4015
RRS002	48.0023
RRS002	49.7235
RRS002	49.3387
RRS002	50.4019
RRS002	49.3995
RRS002	50.4019
RRS002	49.0856
RRS002	50.0475
RRS002	48.7029
RRS002	49.3387
JMC1255	39.2769
JMC1255	38.2745
JMC1255	38.2137
JMC1255	39.2769
JMC1255	38.2745
JMC1255	39.2769
JMC1255	37.9606
JMC1255	38.9225
JMC1255	37.5779
JMC1255	38.2137
JMC1304	33.8019
JMC1304	32.7995
JMC1304	31.4023
JMC1304	33.1235
JMC1304	32.7387
JMC1304	33.8019
JMC1304	32.7995
JMC1304	33.8019
JMC1304	32.4856
JMC1304	33.4475
JMC1240	27.6894
JMC1240	27.6894
JMC1240	29.7488
JMC1240	27.6489
JMC1240	28.0216
JMC1240	27.011
JMC1240	27.7046
JMC1240	29.7113
JMC1240	28.6917
JMC1240	27.6894
JMC1350	33.7029
JMC1350	34.3387
JMC1350	35.4019
JMC1350	34.3995
JMC1350	33.0022
JMC1350	34.7235
JMC1350	34.3387
JMC1350	35.4019
JMC1350	34.3995
JMC1350	35.4019
JMC1254	30.8894
JMC1254	30.8894
JMC1254	32.9488
JMC1254	30.8489
JMC1254	31.2216
JMC1254	30.211
JMC1254	30.9046
JMC1254	32.9113
JMC1254	31.8917
JMC1254	30.8894
JMC1327	34.6356
JMC1327	35.5975
JMC1327	34.2529
JMC1327	34.8888
JMC1327	35.9519
JMC1327	34.9495
JMC1327	33.5522
JMC1327	35.2735
JMC1327	34.8888
JMC1327	35.9519
JMC1273	62.9644
JMC1273	57.9019
JMC1273	59.9613
JMC1273	57.8614
JMC1273	58.2341
JMC1273	57.2235
JMC1273	57.9171
JMC1273	59.9238
JMC1273	58.9042
JMC1273	57.9019
JMC1357	34.9495
JMC1357	35.9519
JMC1357	34.6356
JMC1357	35.5975
JMC1357	34.2529
JMC1357	34.8888
JMC1357	35.9519
JMC1357	34.9495
JMC1357	33.5522
JMC1357	35.2735
JMC1345	32.5388
JMC1345	33.6019
JMC1345	32.5995
JMC1345	33.6019
JMC1345	32.2856
JMC1345	33.2475
JMC1345	31.9029
JMC1345	32.5388
JMC1345	33.6019
JMC1345	32.5995
JMC1270	28.5394
JMC1270	28.5394
JMC1270	30.5988
JMC1270	28.4989
JMC1270	28.8716
JMC1270	27.861
JMC1270	28.5546
JMC1270	30.5613
JMC1270	29.5418
JMC1270	28.5394
JMC1337	38.0019
JMC1337	38.0019
JMC1337	40.0613
JMC1337	37.9614
JMC1337	38.3341
JMC1337	37.3235
JMC1337	38.0171
JMC1337	40.0238
JMC1337	39.0043
JMC1337	38.0019
JMC1245	30.3394
JMC1245	30.3394
JMC1245	32.3988
JMC1245	30.2989
JMC1245	30.6716
JMC1245	30.3394
JMC1245	30.3394
JMC1245	32.3988
JMC1245	30.2989
JMC1245	30.6716
JMC1208	55.911
JMC1208	56.6046
JMC1208	58.6113
JMC1208	57.5917
JMC1208	56.5894
JMC1208	56.5894
JMC1208	56.5894
JMC1208	58.6488
JMC1208	56.5489
JMC1208	56.9216
JMC1348	65.5235
JMC1348	66.2171
JMC1348	68.2238
JMC1348	67.2042
JMC1348	66.2019
JMC1348	66.2019
JMC1348	66.2019
JMC1348	68.2613
JMC1348	66.1614
JMC1348	66.5341
JMC1339	53.836
JMC1339	54.5296
JMC1339	56.5363
JMC1339	55.5168
JMC1339	54.5144
JMC1339	54.5144
JMC1339	54.5144
JMC1339	56.5738
JMC1339	54.4739
JMC1339	54.8466
JMC1288	52.811
JMC1288	53.5046
JMC1288	55.5113
JMC1288	54.4918
JMC1288	53.4894
JMC1288	57.5495
JMC1288	57.4888
JMC1288	58.5519
JMC1288	57.5495
JMC1288	58.5519
JMC1306	42.0731
JMC1306	43.035
JMC1306	41.6904
JMC1306	42.3262
JMC1306	43.3894
JMC1306	42.387
JMC1306	40.9898
JMC1306	42.711
JMC1306	42.3262
JMC1306	43.3894
JMC1264	51.5269
JMC1264	51.5269
JMC1264	53.5863
JMC1264	51.4864
JMC1264	51.8591
JMC1264	50.8485
JMC1264	51.5421
JMC1264	53.5488
JMC1264	52.5293
JMC1264	51.5269
JMC1325	66.6144
JMC1325	66.6144
JMC1325	68.6738
JMC1325	66.5739
JMC1325	66.9466
JMC1325	65.936
JMC1325	66.6296
JMC1325	68.6363
JMC1325	67.6167
JMC1325	66.6144
JMC1297	30.3394
JMC1297	30.3394
JMC1297	32.3988
JMC1297	30.2989
JMC1297	30.6716
JMC1297	29.661
JMC1297	30.3546
JMC1297	32.3613
JMC1297	31.3417
JMC1297	30.3394
JMC1313	39.0394
JMC1313	39.0394
JMC1313	41.0988
JMC1313	38.9989
JMC1313	39.3716
JMC1313	38.361
JMC1313	39.0546
JMC1313	41.0613
JMC1313	40.0418
JMC1313	39.0394
JMC1336	40.6647
JMC1336	42.386
JMC1336	42.0012
JMC1336	43.0644
JMC1336	42.062
JMC1336	43.0644
JMC1336	41.7481
JMC1336	42.71
JMC1336	41.3654
JMC1336	42.0012
JMC1364	43.6894
JMC1364	42.687
JMC1364	42.6262
JMC1364	43.6894
JMC1364	42.687
JMC1364	43.6894
JMC1364	42.3731
JMC1364	43.335
JMC1364	41.9904
JMC1364	42.6262

## Sheet: PCA Analysis
Accession	Leaf area	Dry mass of leaves	SLA	Trichomes	Hardness	Thickness	Leaves	Photo	Cond	Ci	EUA	Trmmol
RRRS001	565.934	2.15521	269.646	20.3556	0.55	0.3212	295.867	23.2746	0.466231	16.0508	3.92696	5.95367
JMC1271	516.839	5.50557	418.888	16.3333	0.583333	0.435667	246	23.5192	0.558119	10.2578	3.46243	6.80744
JMC1280	497.141	6.63357	629.214	22.0444	0.633333	0.362733	279.867	25.3042	0.642109	6.23067	3.51114	7.15168
RRRS002	452.923	8.32476	295.18	12.2222	0.633333	0.362733	279.867	27.5497	0.631886	10.1307	4.03578	6.85314
JMC1255	313.954	8.21846	95.6688	15.1778	0.659333	0.6	218.533	23.1956	0.582404	13.088	3.50147	6.67579
JMC1304	468.764	6.64846	383.148	14.7778	0.55	0.320933	270.2	25.5322	0.673557	16.4194	3.56188	7.21997
JMC1240	1034.57	2.04214	535.002	12.2	0.55	0.320933	270.2	22.2518	0.461206	23.6484	3.81798	5.96473
JMC1350	1217.18	4.35409	2471.05	15.4667	0.6	0.343867	462.533	24.7347	0.494127	10.1588	3.82096	6.51236
JMC1254	1119.63	1.07677	1044.98	13.7778	0.583333	0.408733	585.333	22.238	0.508984	10.6498	3.20302	6.98598
JMC1327	1104.2	1.09334	1018.01	15.1333	0.744667	0.328533	577.267	23.0415	0.48974	12.8922	3.44842	6.64037
JMC1273	690.138	1.74959	397.729	15.1333	0.533333	0.3638	360.8	29.5535	0.823112	12.328	3.57618	8.33113
JMC1357	398.372	3.04344	133.064	14.6444	0.606667	0.357333	208.267	25.185	0.658628	22.8147	3.64738	7.06757
JMC1345	449.891	2.73384	172.07	18.8222	0.593333	0.243333	235.2	23.2125	0.575654	13.4968	3.51266	6.67459
JMC1270	449.891	2.73384	172.07	18.9111	0.593333	0.243333	235.2	24.7931	0.540334	13.3931	4.20684	5.93064
JMC1337	449.891	2.73384	172.07	18.2889	0.593333	0.243333	235.2	21.6417	0.41272	16.7805	4.35775	4.99383
JMC1245	467.488	2.66832	188.911	11.8444	0.6	0.323333	244.4	26.963	0.561503	7.07062	4.28698	6.29409
JMC1208	1384.74	0.935425	1696.82	10.3111	0.624533	0.286	723.933	21.6569	0.436766	11.2637	3.82857	5.68693
JMC1348	399.539	7.57643	470.026	18.5556	0.473333	0.254	141.533	23.3612	0.483447	6.56717	3.73913	6.25624
JMC1339	1937.1	0.606791	3192.37	19.0889	0.624533	0.286	723.933	19.1691	0.393246	11.3831	3.28152	5.90678
JMC1288	1241.92	1.03247	1357.54	15.5778	0.568667	0.317667	649.267	26.0137	0.690336	6.08843	3.88013	6.70638
JMC1306	735.4	3.08003	257.393	22.5556	0.624533	0.286	723.933	23.2425	0.620981	6.95258	3.66538	6.36271
JMC1264	1343.81	0.941455	1578.71	20.3778	1.15	0.224133	702.533	27.762	0.817069	2.8808	3.91417	7.07533
JMC1325	947.856	1.27701	752.081	19.9556	1.03333	0.188733	495.533	27.9657	0.716499	3.74513	3.9962	6.98226
JMC1297	1086.6	1.12139	994.363	12.6889	0.766	0.331267	568.067	23.8727	0.689248	14.7188	3.62025	6.6921
JMC1313	1358.85	1.0864	1851.72	13.8444	0.983333	0.250733	710.4	25.8771	0.863781	10.1675	3.48021	7.43068
JMC1336	1241.92	1.03247	1357.54	17.3111	0.568667	0.317667	649.267	18.7668	0.818429	6.97069	2.59984	7.24571
JMC1364	1384.74	0.935425	1696.82	17.2444	0.624533	0.286	723.933	22.9646	4.08019	32.6052	3.17997	8.07671

## Sheet:  RDA Analysis
Accession	Leaf area	Dry mass of leaves	SLA	Trichomes	Hardness	Thickness	Leaves	Photo	Cond	Ci	EUA	Trmmol	Cumulative damage index	Seed yield
RRRS001	565.934	2.15521	269.646	20.3556	0.55	0.3212	295.867	23.2746	0.466231	16.0508	3.92696	5.95367	0.142857	45.2477
JMC1271	516.839	5.50557	418.888	16.3333	0.583333	0.435667	246	23.5192	0.558119	10.2578	3.46243	6.80744	0.285714	45.1529
JMC1280	497.141	6.63357	629.214	22.0444	0.633333	0.362733	279.867	25.3042	0.642109	6.23067	3.51114	7.15168	0.178378	45.2477
RRRS002	452.923	8.32476	295.18	12.2222	0.633333	0.362733	279.867	27.5497	0.631886	10.1307	4.03578	6.85314	0.240964	41.2401
JMC1255	313.954	8.21846	95.6688	15.1778	0.659333	0.6	218.533	23.1956	0.582404	13.088	3.50147	6.67579	0.383721	30.1176
JMC1304	468.764	6.64846	383.148	14.7778	0.55	0.320933	270.2	25.5322	0.673557	16.4194	3.56188	7.21997	0.348837	24.6422
JMC1240	1034.57	2.04214	535.002	12.2	0.55	0.320933	270.2	22.2518	0.461206	23.6484	3.81798	5.96473	0.248322	23.5452
JMC1350	1217.18	4.35409	2471.05	15.4667	0.6	0.343867	462.533	24.7347	0.494127	10.1588	3.82096	6.51236	0.383721	26.2409
JMC1254	1119.63	1.07677	1044.98	13.7778	0.583333	0.408733	585.333	22.238	0.508984	10.6498	3.20302	6.98598	0.133333	26.7452
JMC1327	1104.2	1.09334	1018.01	15.1333	0.744667	0.328533	577.267	23.0415	0.48974	12.8922	3.44842	6.64037	0.574324	26.7901
JMC1273	690.138	1.74959	397.729	15.1333	0.533333	0.3638	360.8	29.5535	0.823112	12.328	3.57618	8.33113	0.105263	53.7639
JMC1357	398.372	3.04344	133.064	14.6444	0.606667	0.357333	208.267	25.185	0.658628	22.8147	3.64738	7.06757	0.277372	26.7901
JMC1345	449.891	2.73384	172.07	18.8222	0.593333	0.243333	235.2	23.2125	0.575654	13.4968	3.51266	6.67459	0.178404	24.4426
JMC1270	449.891	2.73384	172.07	18.9111	0.593333	0.243333	235.2	24.7931	0.540334	13.3931	4.20684	5.93064	0.111111	24.3952
JMC1337	449.891	2.73384	172.07	18.2889	0.593333	0.243333	235.2	21.6417	0.41272	16.7805	4.35775	4.99383	0.389189	33.8577
JMC1245	467.488	2.66832	188.911	11.8444	0.6	0.323333	244.4	26.963	0.561503	7.07062	4.28698	6.29409	0.105882	26.1952
JMC1208	1384.74	0.935425	1696.82	10.3111	0.624533	0.286	723.933	21.6569	0.436766	11.2637	3.82857	5.68693	0.335025	52.4452
JMC1348	399.539	7.57643	470.026	18.5556	0.473333	0.254	141.533	23.3612	0.483447	6.56717	3.73913	6.25624	0.240964	62.0577
JMC1339	1937.1	0.606791	3192.37	19.0889	0.624533	0.286	723.933	19.1691	0.393246	11.3831	3.28152	5.90678	0.670051	50.3702
JMC1288	1241.92	1.03247	1357.54	15.5778	0.568667	0.317667	649.267	26.0137	0.690336	6.08843	3.88013	6.70638	0.647059	49.3698
JMC1306	735.4	3.08003	257.393	22.5556	0.624533	0.286	723.933	23.2425	0.620981	6.95258	3.66538	6.36271	0.310345	34.2276
JMC1264	1343.81	0.941455	1578.71	20.3778	1.15	0.224133	702.533	27.762	0.817069	2.8808	3.91417	7.07533	0.334347	47.3827
JMC1325	947.856	1.27701	752.081	19.9556	1.03333	0.188733	495.533	27.9657	0.716499	3.74513	3.9962	6.98226	0.21875	62.4702
JMC1297	1086.6	1.12139	994.363	12.6889	0.766	0.331267	568.067	23.8727	0.689248	14.7188	3.62025	6.6921	0.181818	26.1952
JMC1313	1358.85	1.0864	1851.72	13.8444	0.983333	0.250733	710.4	25.8771	0.863781	10.1675	3.48021	7.43068	0.240741	34.8952
JMC1336	1241.92	1.03247	1357.54	17.3111	0.568667	0.317667	649.267	18.7668	0.818429	6.97069	2.59984	7.24571	0.248322	33.9026
JMC1364	1384.74	0.935425	1696.82	17.2444	0.624533	0.286	723.933	22.9646	4.08019	32.6052	3.17997	8.07671	0.214286	34.5301
